# Supplementary material
Source: PubMed Central journal article supplement (PMC10122270)
Supplement: NIHMS1883306-supplement-Supplemental_Material.pdf [file NIHMS1883306-supplement-Supplemental_Material.pdf]

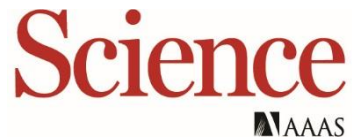

## Supplementary Materials for

### **Dome1–JAK–STAT signaling between parasite and host integrates vector immunity and development**

Vipin S. Rana *et al.*

Corresponding author: Utpal Pal, upal@umd.edu

*Science* **379**, eabl3837 (2023)  
DOI: 10.1126/science.abl3837

#### **The PDF file includes:**

Figs. S1 to S21  
Tables S1 to S8

#### **Other Supplementary Material for this manuscript includes the following:**

MDAR Reproducibility Checklist

**Fig. S1. Approach for the identification of the IFN- $\gamma$ -binding tick protein**

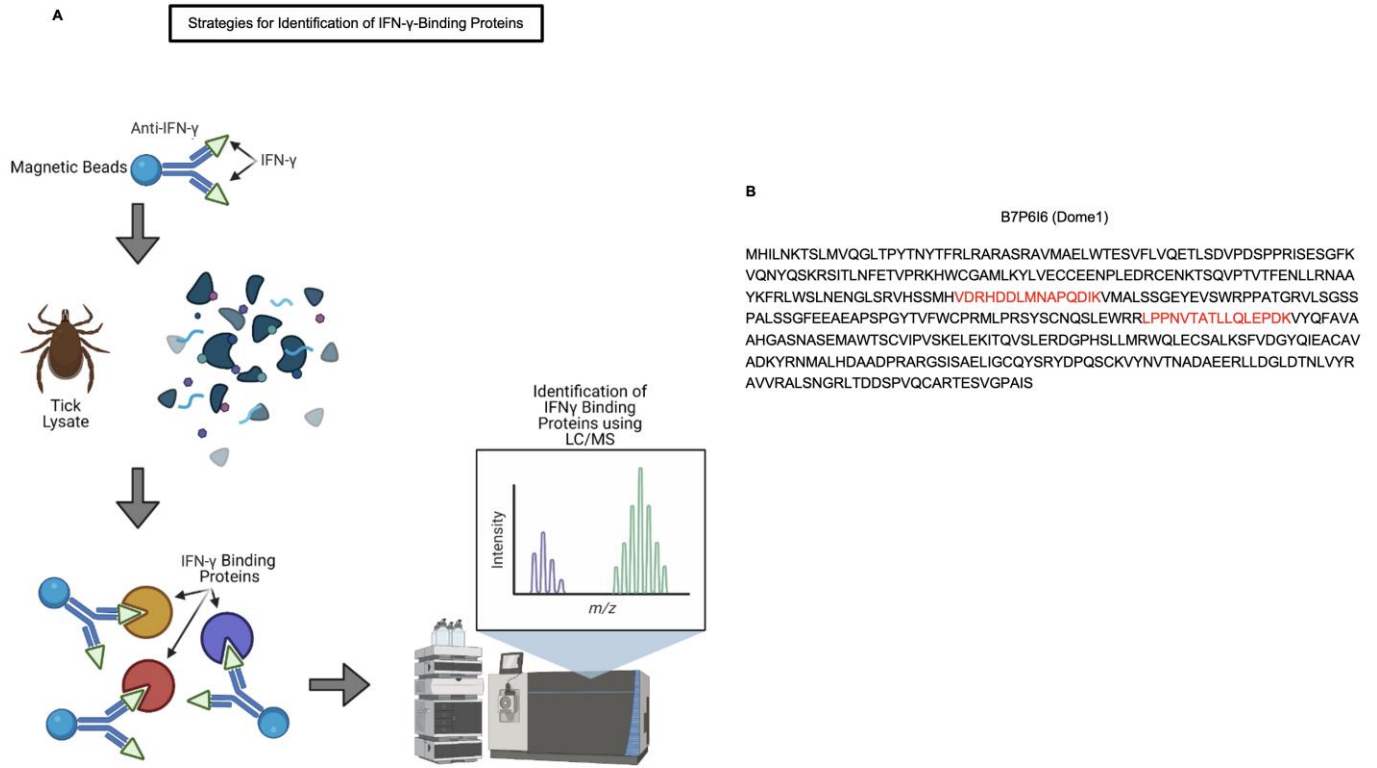

**Fig. S1. Approach for the identification of the IFN- $\gamma$ -binding tick protein**

(A) A schematic diagram showing the strategy for a co-immunoprecipitation assay using IFN- $\gamma$ . Mouse recombinant IFN- $\gamma$  was immobilized using Protein G Sepharose beads via rat anti-IFN- $\gamma$  antibodies and incubated with whole tick lysates. After extensive washing, the proteins bound to IFN- $\gamma$  were isolated and identified using a nano LC-MS/MS analysis. (B) Amino acid sequence of one of the IFN- $\gamma$ -binding proteins, annotated as the cell adhesion molecule protein B7P6I6 and herein termed as Dome1, is shown. Two unique peptides (red font) of the Dome1 extracellular domain were identified via nano LC-MS/MS analysis (panel A). Results are representative of two independent experiments.

**Fig. S2. Comparison of predicted structures and amino acid sequences of five Dome homologs from *Ixodes scapularis***

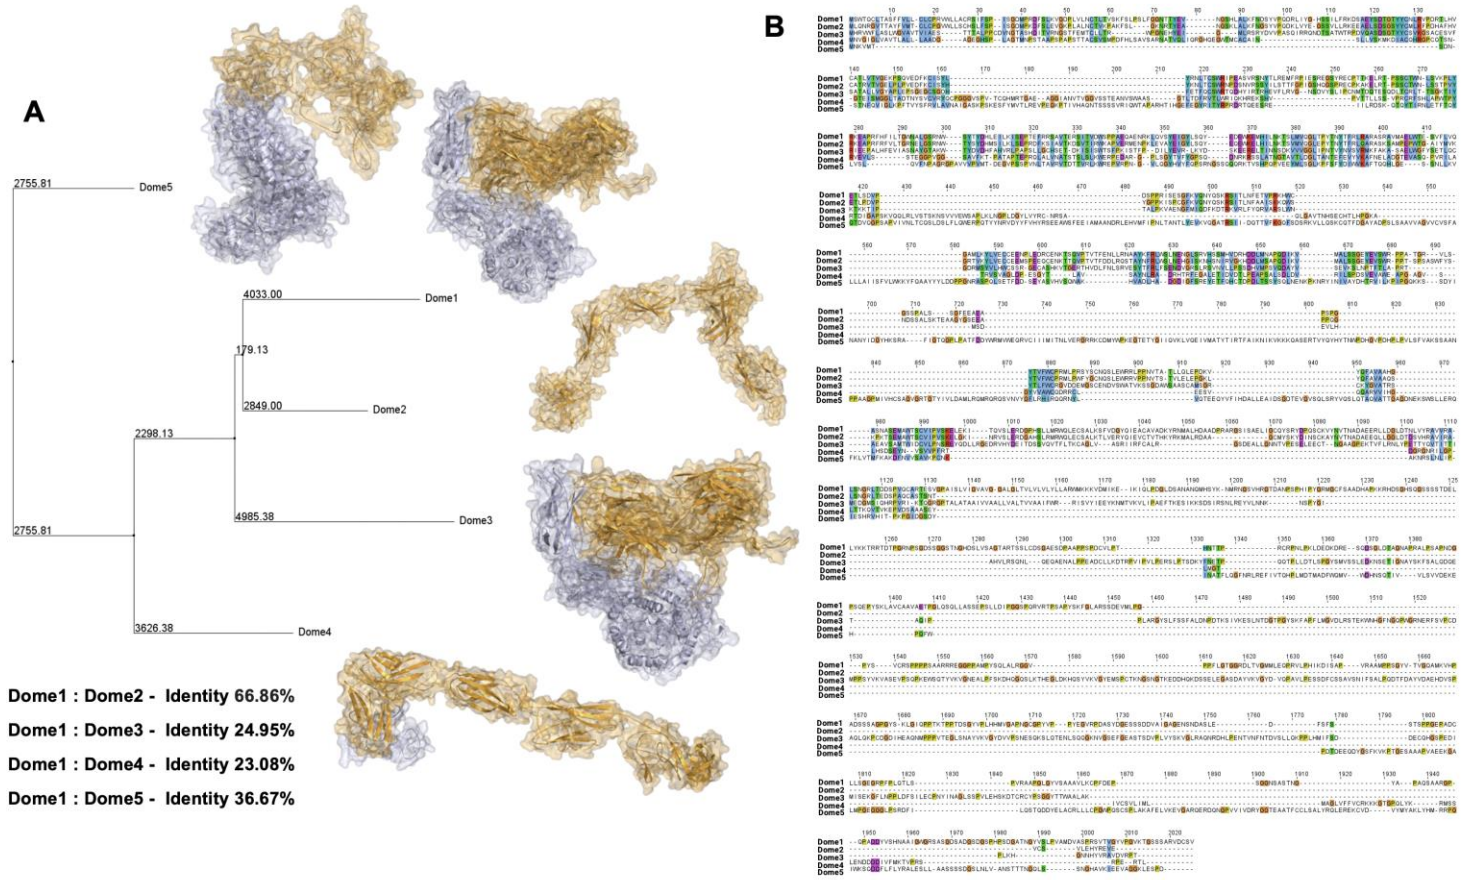

**Fig. S2. Comparison of predicted structures and amino acid sequences of five Dome homologs from *Ixodes scapularis***

(A) A neighbor-joining phylogenetic tree, identity, and predicted structures showing the relationship of five *Ixodes* Dome proteins. The scale bar shows the approximate divergence in amino acid changes per residue. (B) The amino acid sequence homology between Dome homologs from *I. scapularis*. Amino acids with similar properties are labeled with identical colors.

**Fig. S3. Phylogenetic analyses of Dome1**

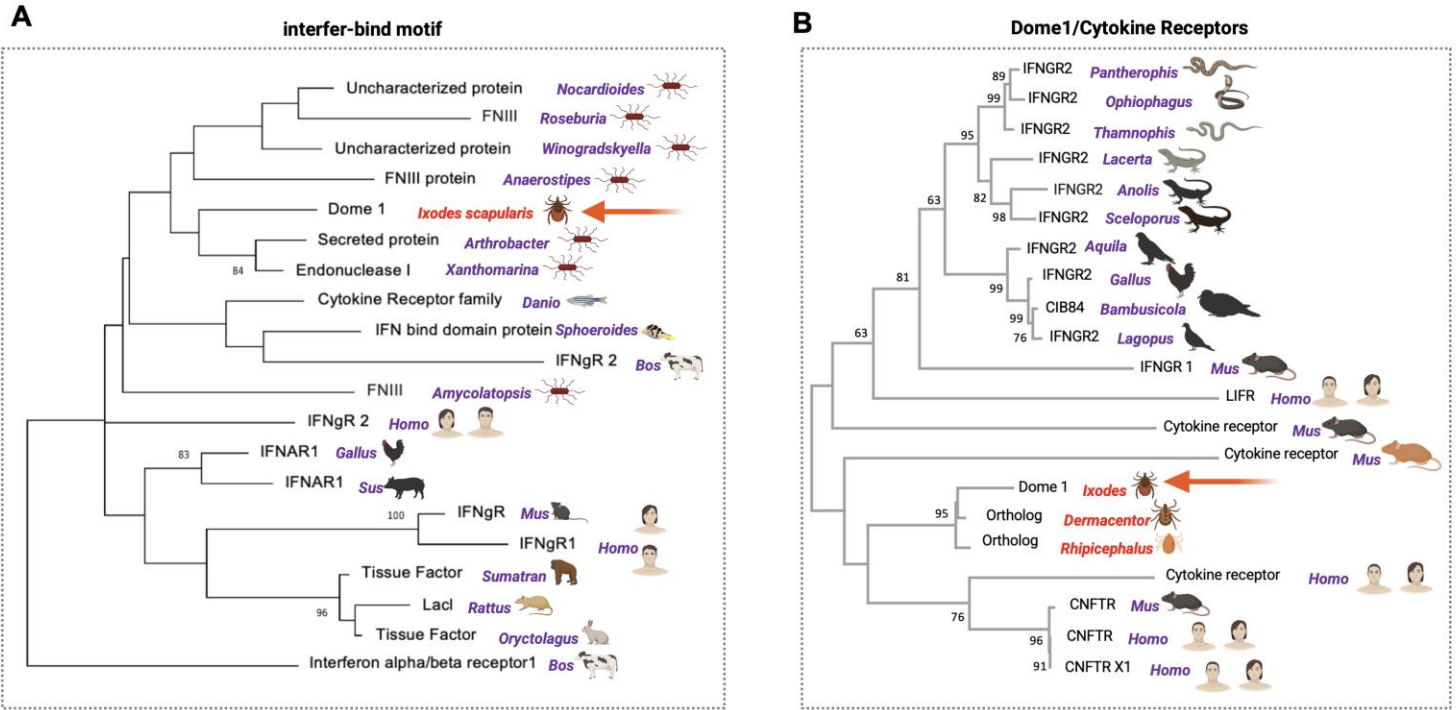

**Fig. S3. Phylogenetic analyses of Dome1**

(A) Occurrence of mammalian interfer-bind motif in proteins of several bacterial and animal species and *Ixodes* Dome1. The comparative sequence analysis of interfer-bind motif revealed its close match to several bacterial and animal proteins, and Dome1. A maximum likelihood phylogenetic tree was generated using interfer-bind motif from various bacterial and animal species. Branch support values greater than 0.7 are indicated by numbers. Note that bacterial genera, such as *Roseburia*, are known to be present in wild-caught *I. scapularis* ticks. (B) The comparative sequence analysis of vertebrate cytokine receptors revealed a close match to Dome1. A maximum likelihood phylogenetic tree was generated using available sequences for various cytokine receptors from selected reptilian, avian, and mammalian genomes and representative tick Dome proteins.

**Fig. S4. Purification of Dome1 protein and generation of polyclonal antibodies**

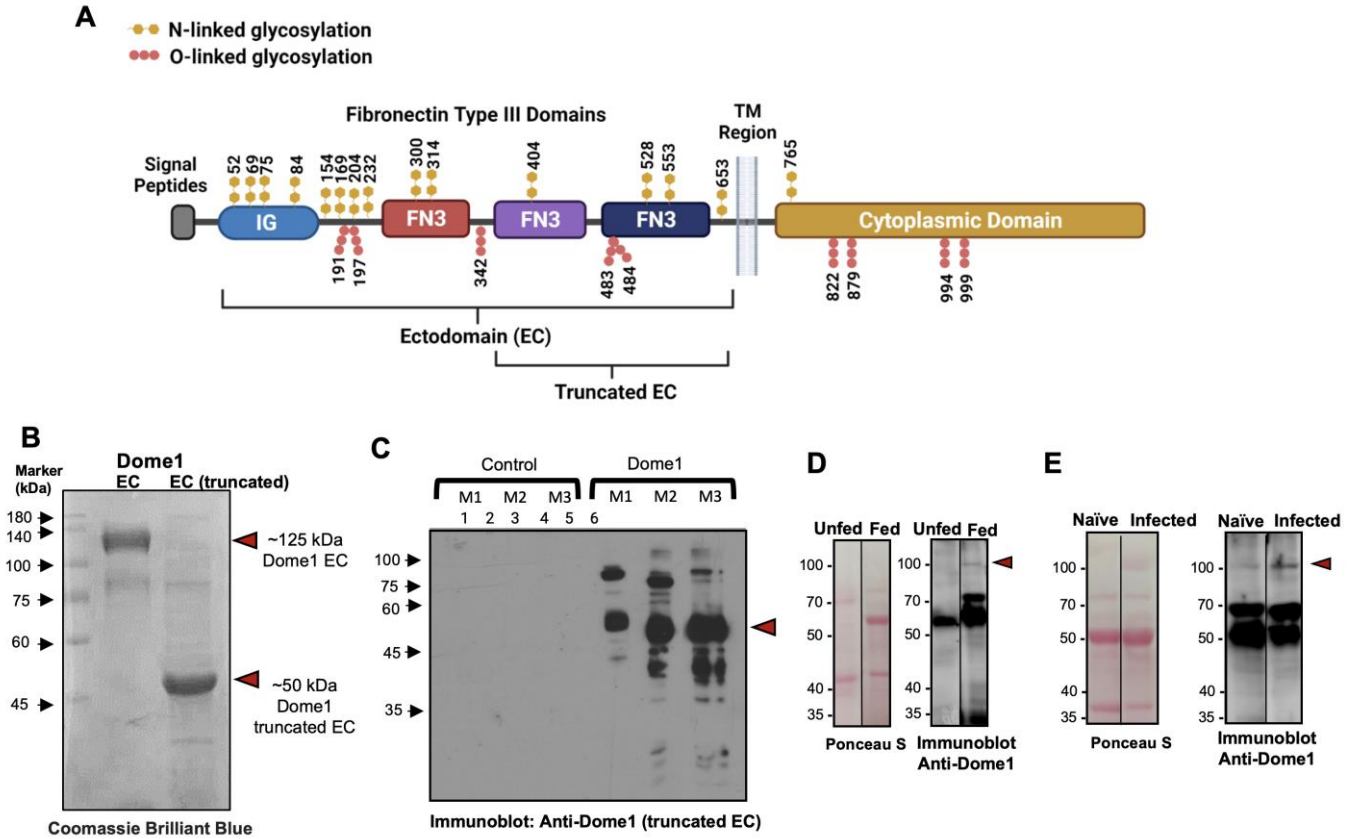



#### **Fig. S4. Purification of Dome1 protein and generation of polyclonal antibodies**

(A) Schematic representation of Dome1 showing glycosylation sites and regions that were targeted for the production of recombinant Dome1 proteins. The entire non-cytoplasmic/extracellular domain (Ectodomain, EC), ~125 kDa, was cloned and expressed in a mammalian (CHO cell) expression system, while smaller regions like (truncated EC), ~50 kDa, was produced using a bacterial (*E. coli*) expression system. (B) Purified His-tagged recombinant Dome1 proteins (EC and truncated EC, arrows). The proteins were resolved using 12% SDS-PAGE gel and stained with Coomassie Brilliant Blue. (C) Generation of murine polyclonal anti-Dome1 antibodies. Groups of mice were immunized with recombinant Dome1 (truncated EC), and their serum was analyzed for the presence of anti-Dome1 antibodies. Lanes 1-3 represent individual control mice immunized with PBS and adjuvant, while lanes 4-6 represent mice immunized with Dome1; antibodies against ~50 kDa truncated EC Dome1 is indicated by an arrowhead. (D) Detection of Dome1 in *I. scapularis* nymphs. Antibody against Dome1 (panel C) was used to detect Dome1 expressed in unfed and 48-hour-fed nymphs (arrowhead), while total protein profile is shown by staining with Ponceau S. (E) Enhanced Dome1 production in *B. burgdorferi*-infected fed nymphs. Nymphal tick lysates (3 ticks per group) were prepared from separate groups of 48-hour-fed ticks that fed either on naïve C3H mice or a parallel group of mice that were infected with *B. burgdorferi* for two weeks. Comparable protein levels were shown by staining with Ponceau S, with Dome1 indicated by arrowhead.

**Fig. S5. *Anaplasma phagocytophilum* infection does not trigger JAK–STAT signaling and Dae2 antimicrobial responses in *I. scapularis* ticks**

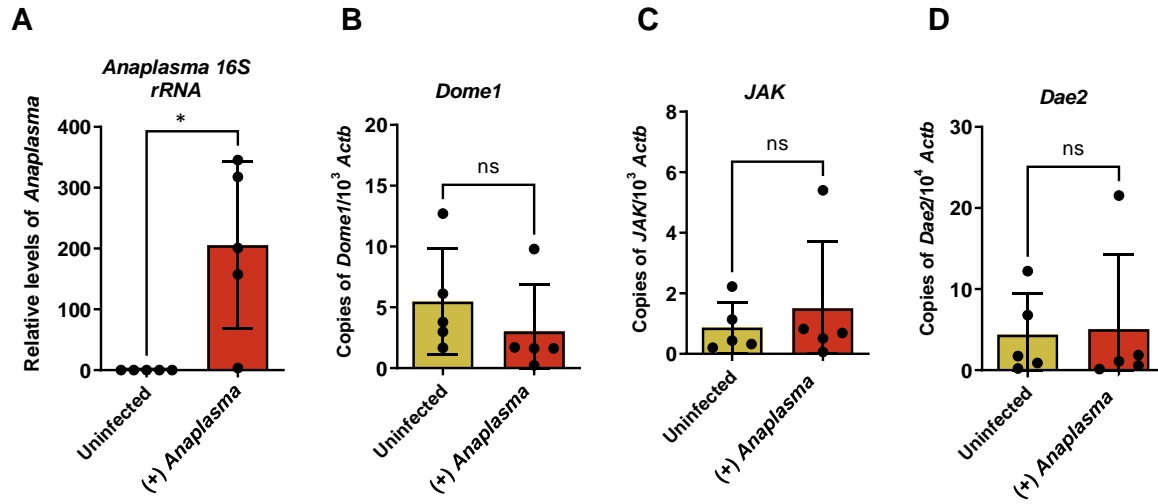

**Fig. S5. *Anaplasma phagocytophilum* infection does not trigger JAK–STAT signaling and *Dae2* antimicrobial responses in *I. scapularis* ticks**

Groups of nymphs were allowed to feed on naïve or *A. phagocytophilum*-infected mice and were then analyzed for the induction of *Dome1* and the JAK–STAT pathway. **(A)** The presence of *A. phagocytophilum* in infected nymphs. Nymphs that fed on naïve or infected mice were processed for qPCR using pathogen-specific 16S rRNA primers. *A. phagocytophilum*-specific signals were undetectable when feeding on uninfected mice, but were detectable in the group that parasitized infected mice. **(B to D)** The transcript levels of *Dome1* (panel B), *JAK* (panel C), and *Dae2* (D) were analyzed in naïve and *Anaplasma*-infected tick guts (5 nymphs per group) using RT-qPCR and gene-specific primers. The mRNA levels for all genes in naïve or *A. phagocytophilum*-infected ticks were statistically non-significant (ns). Data are presented as mean  $\pm$  SD; n = 5; \* $P < 0.05$ , determined using two-tailed Mann–Whitney *U* test.

**Fig. S6. IFN- $\gamma$  and *Dome1* deficiency in murine blood and tick organs**

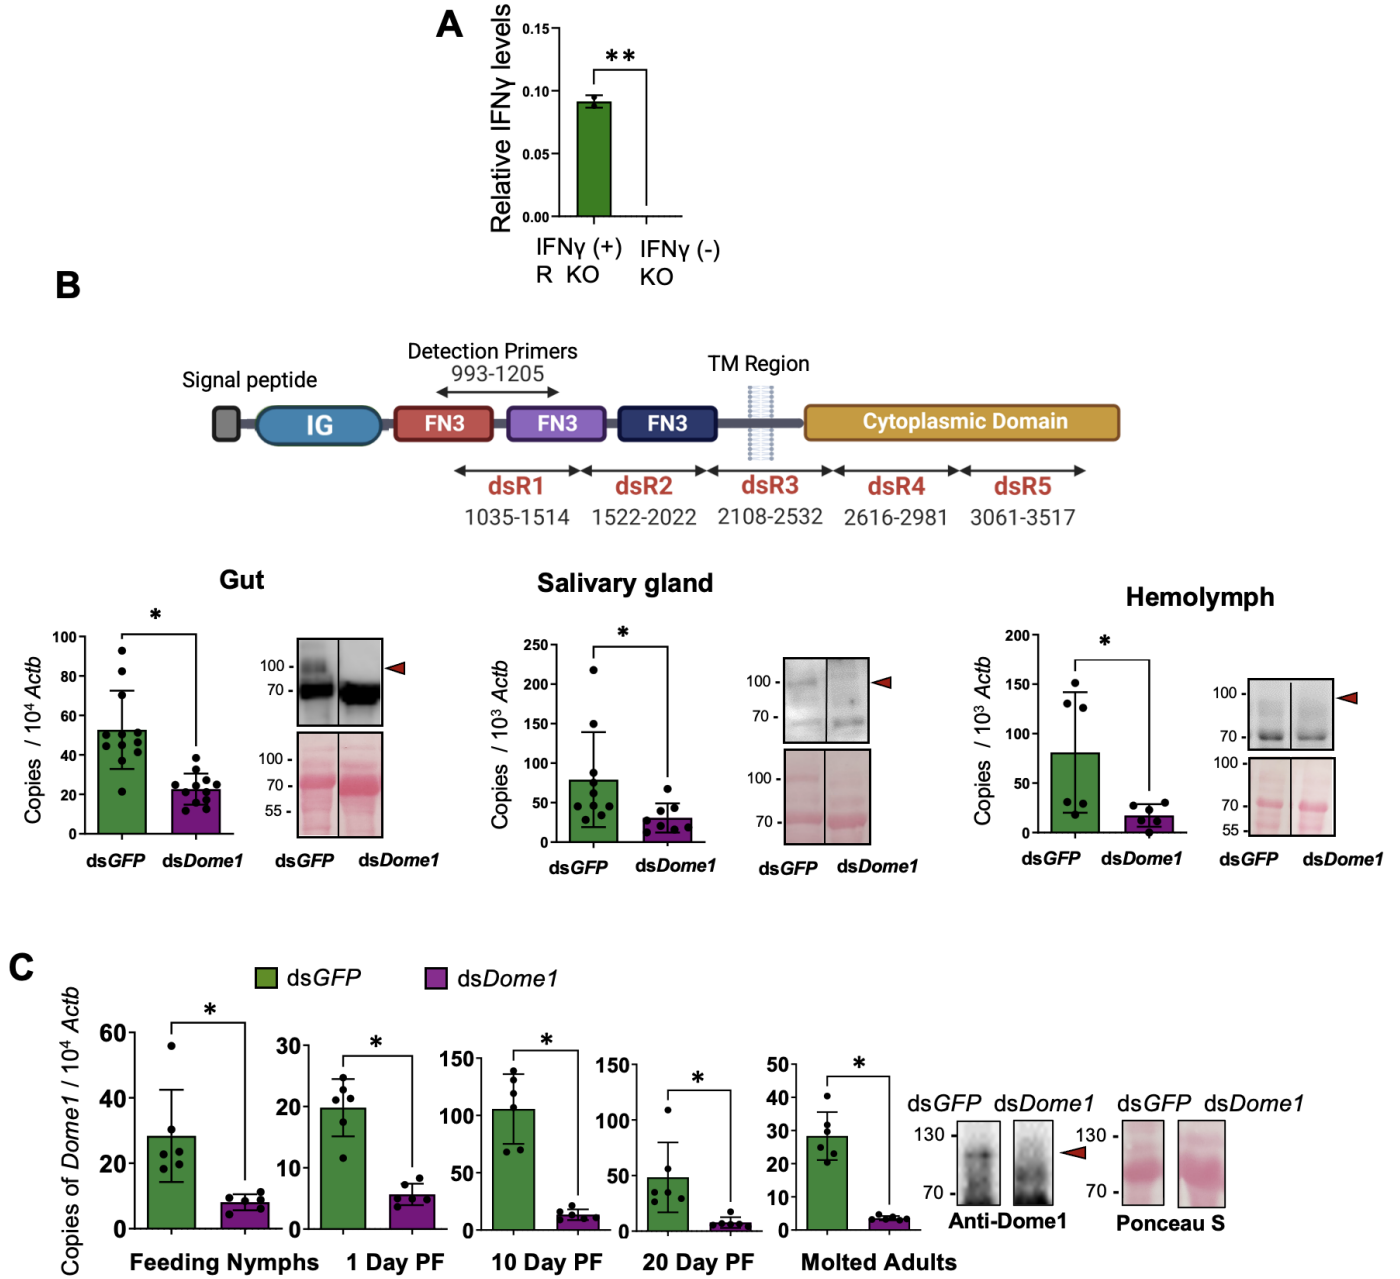

**Fig. S6. IFN- $\gamma$  and *Dome1* deficiency in murine blood and tick organs**

(A) Lack of IFN- $\gamma$  in blood sample of *Ifngr1*-knockout mice, as detected by standard ELISA.

\*\* $P < 0.05$ , determined using two-tailed Student's *t* test. (B) *Dome1* expression and its silencing via RNA interference (RNAi). The upper panel shows a schematic representation of the *Dome1* open reading frame, showing regions targeted for RNAi. The lower panel represents *Dome1* knockdown in multiple nymphal tick organs. Separate groups of ticks were microinjected with dsRNA targeting *GFP* or *Dome1* and then placed on naïve C3H mice for 48 hours. The partially fed ticks were collected from mice and dissected for hemolymph, salivary gland, and gut samples. The levels of *Dome1* transcripts and protein in all three organs were quantified via RT-qPCR by using *Dome1* primers and normalizing against transcripts of tick  *$\beta$ -actin* (*Actb*) levels, and by western blotting using *Dome1* antibodies (arrows, adjacent panels). Significant downregulation of *Dome1* transcripts was observed in the tested organs of *Dome1*-knockdown ticks. The experiments were repeated three times and each dot represents the pool of tissue samples collected from at least three ticks. (C) Transstadial maintenance of RNAi-mediated *Dome1* knockdown in nymphs throughout tick feeding (48 hours), post-fed (PF) intermolt periods, and adult stage. The rightmost panels show the knockdown of *Dome1* protein levels in adult tick gut samples (arrowheads). Results are representative of two to three independent experiments ( $n = 6-10$ ); \* $P < 0.05$ , determined using two-tailed Mann–Whitney *U* test.

Fig. S7. Impact of *Dome1* knockdown on expression of other *Dome* homologs

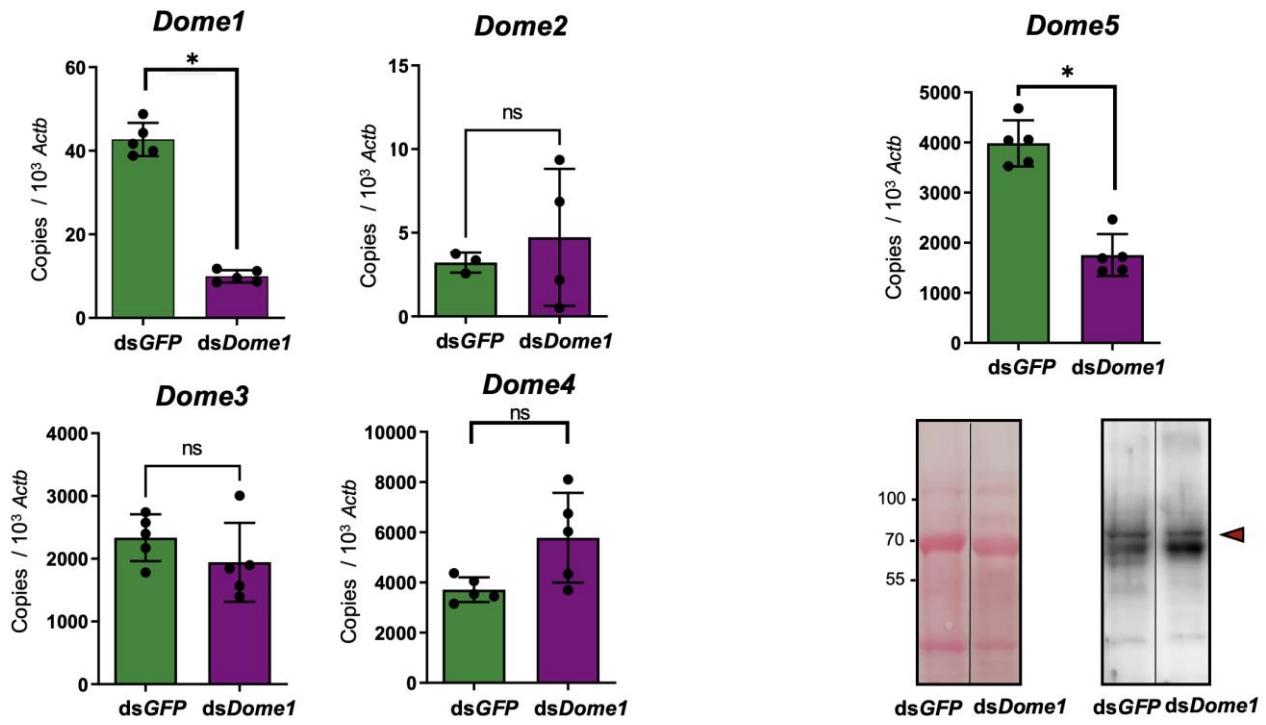

**Fig. S7. Impact of *Dome1* knockdown on expression of other *Dome* homologs**

The expression of *Dome2*, *Dome3*, *Dome4*, and *Dome5* were analyzed in *Dome1*-knockdown ticks via RT-qPCR. Nymphs were microinjected with dsRNA targeting either *GFP* or *Dome1* and were placed on naïve C3H mice for 48 hours. The partially fed ticks were collected from mice and analyzed for the expression of all *Dome* homologs. Notably, except for *Dome5*, no significant variations were observed in the expression of *Dome2*, *Dome3*, and *Dome4*. The lower right panel denotes the detection of *Dome5* protein in 48-hour-fed *I. scapularis* nymphs. Gut samples from *Dome1*-knockdown or control ticks were immunoblotted using antibody generated against recombinant *Dome5* (fig. S9). The arrowhead denotes the position of native *Dome5* in ticks. The total protein profile in the tick gut is shown by Ponceau S staining. Results are representative of two to three independent experiments. Quantitative data are shown as individual data points and means  $\pm$  SDs (n = 5). \* $P < 0.05$ , determined using two-tailed Mann–Whitney *U* test; ns, non-significant.

Fig. S8. *Dome1* deficiency alters homeostasis of reactive oxygen species in feeding ticks

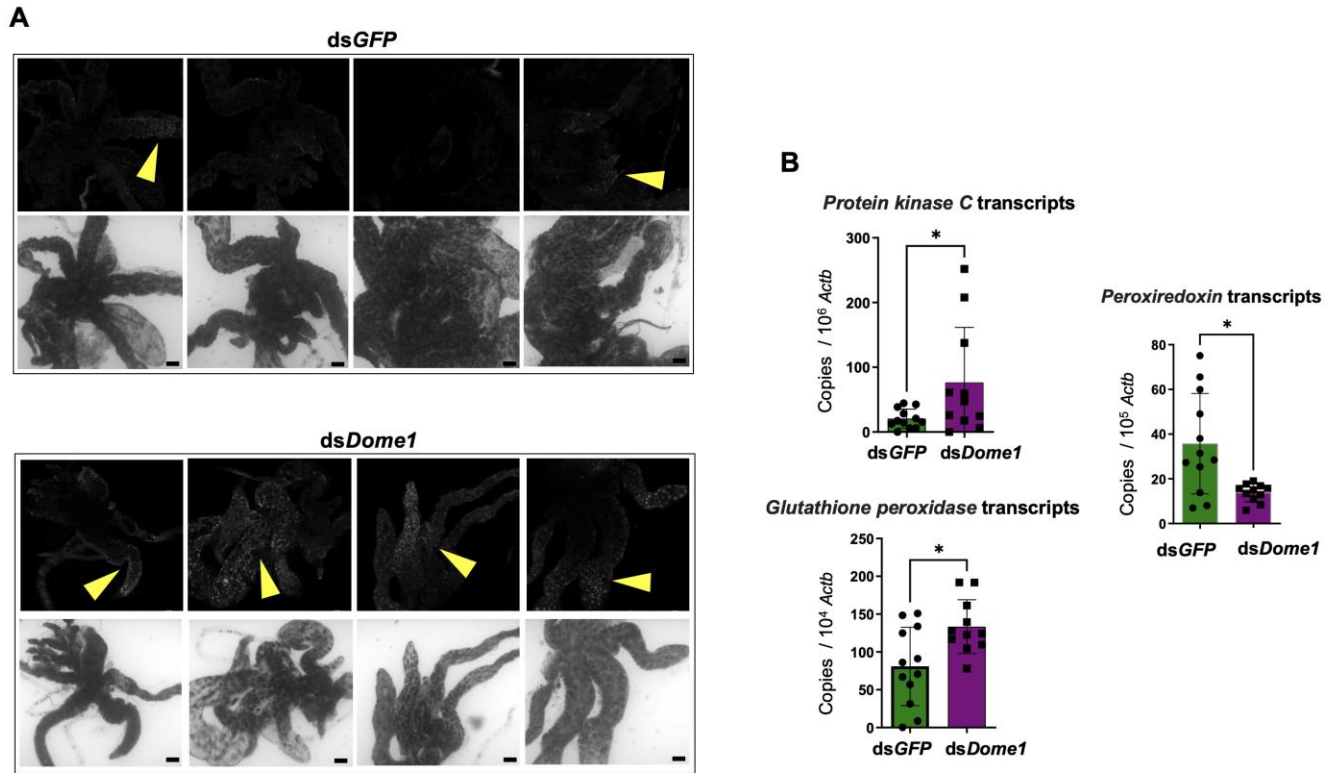



**Fig. S8. *Dome1* deficiency alters homeostasis of reactive oxygen species in feeding ticks**

Separate groups of nymphs (25 ticks per group) were microinjected with ds*Dome1* or control ds*GFP* RNA (4 µg/µl) and then fed on *B. burgdorferi*-infected mice for 48 hours. (A) The dissected gut samples from partially fed ticks were processed for the detection of ROS using dihydroethidium reagent (DHE), which detects superoxide radicals. Once oxidized, DHE intercalates into DNA and fluoresces red (presented in a gray scale). A higher level of ROS production was observed in *Dome1*-knockdown ticks (arrows), as assessed via confocal immunofluorescence microscopy. Scale bar = 100 µm. (B) The expression profiles of a few representative genes associated with ROS homeostasis, including *protein kinase C*, *peroxiredoxin*, and *glutathione peroxidase*, were compared in ticks microinjected with ds*Dome1* or control ds*GFP*. The expression levels of target genes were normalized against tick *Actb* levels. Results are representative of two to three independent experiments. Quantitative data are shown as individual data points and means ± SDs (n = 6 to 10). \**P*<0.05, determined using two-tailed Mann–Whitney *U* test.

**Fig. S9. RNAi-mediated knockdown of *Dome5* has no effect on JAK–STAT signaling, *B. burgdorferi* colonization, or tick metamorphosis**

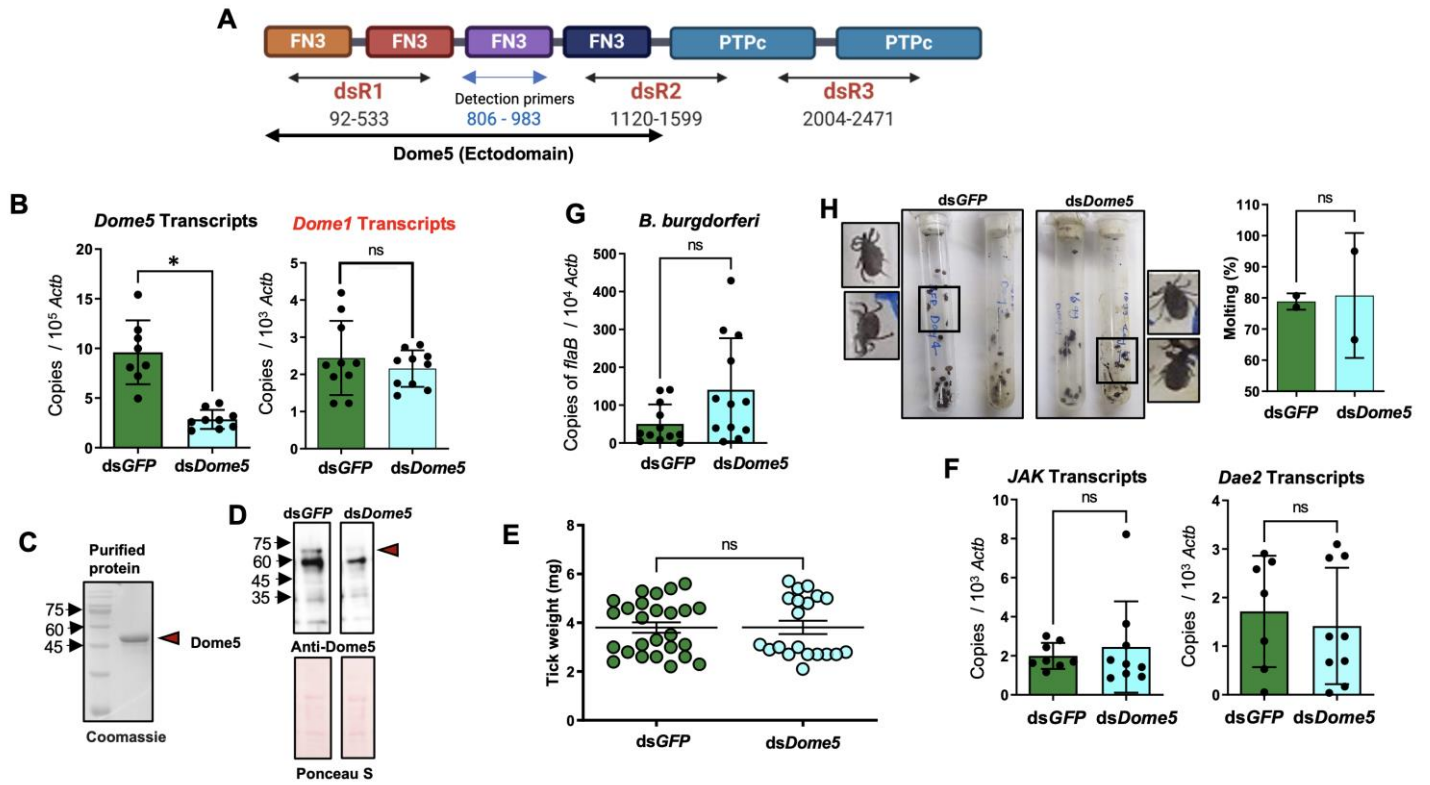

**Fig. S9. RNAi-mediated knockdown of *Dome5* has no effect on JAK–STAT signaling, *B. burgdorferi* colonization, or tick metamorphosis**

(A) Schematic representation of the *Dome5* open reading frame, showing regions targeted for RNAi. The regions encompassing dsRNA constructs (ds*R1*-ds*R3*) and detection primers are shown. A pool of ds*R1*-*R3* RNA was used to knock down *Dome5*. (B) The knockdown of *Dome5* in nymphal ticks. Nymphs (20 ticks per group) were microinjected with ds*Dome5* or control ds*GFP* RNA (4 µg/µl) and then fed on *B. burgdorferi*-infected mice for 48 hours. The partially fed ticks were processed for *Dome5* and *Dome1* mRNA levels using specific primers and normalizing against tick *Actb* levels. (C) Purified recombinant *Dome5* protein (arrow), which was used to generate polyclonal antibodies in mice. (D) Detection of native *Dome5* in *Dome5*-knockdown ticks. The gut samples from 48-hour-fed *Dome5*-knockdown or control ticks, as detailed in panel B, were analyzed by immunoblotting using anti-*Dome5* antibodies. Equal protein loading is indicated by Ponceau S (lower panels). (E) *Dome5* silencing did not impact tick feeding. The engorgement weights of fed ticks are indicated. (F) *Dome5* knockdown had no effects on the JAK–STAT pathway and associated antimicrobial responses. *Dome5*-knockdown or control ticks were assessed for transcript levels of *JAK* and *Dae2* by RT-qPCR. (G) Knockdown of *Dome5* did not influence the colonization of *B. burgdorferi* within the tick gut. The spirochete burden in 48-hour-fed ticks was assessed via measuring *flaB* transcripts and normalizing to tick *Actb* using RT-qPCR. (H) *Dome5* function is not associated with tick molting, as seen in representative images of molted ticks (left panel) and its quantitative presentation (right panel). Results are representative of two to three independent experiments. Quantitative data are shown as individual data points and means ± SDs (n = 8 to 26). \**P*<0.05, determined using two-tailed Mann–Whitney U test; ns, non-significant.

Fig. S10. Scanning electron micrographs of knockdown ticks

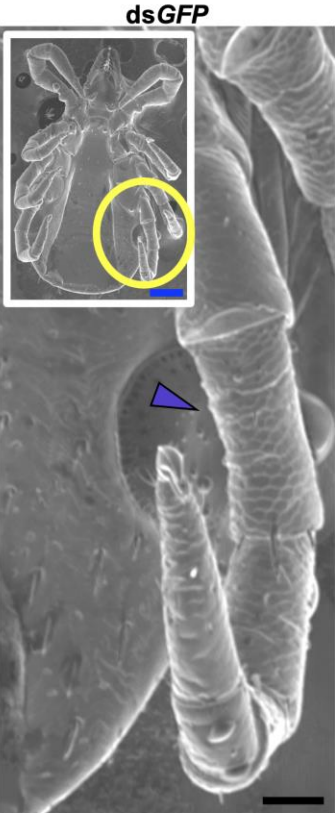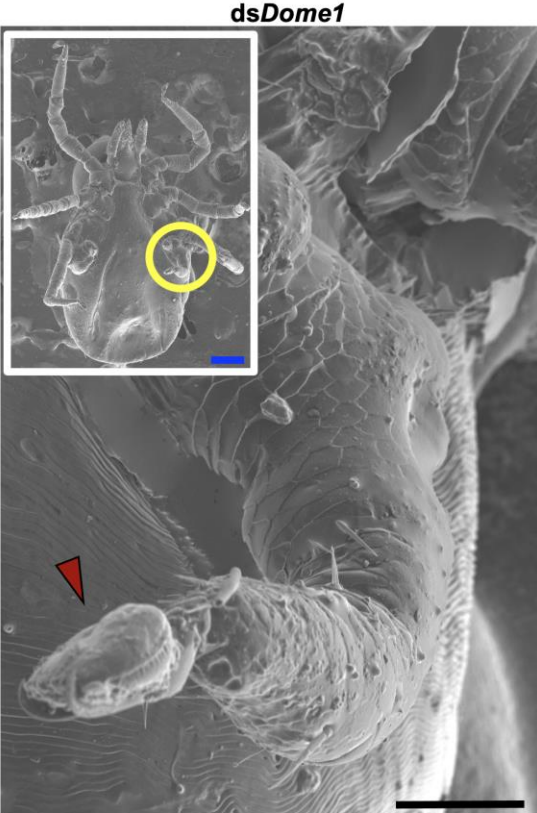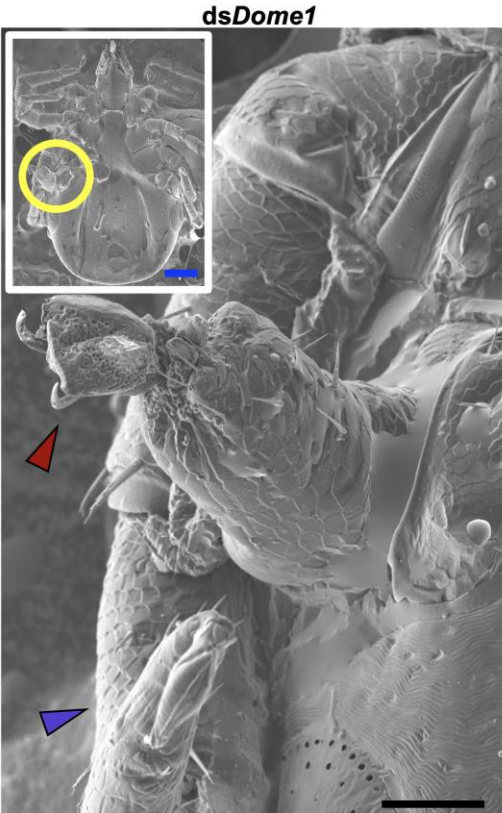

**Fig. S10. Scanning electron micrographs of knockdown ticks**

Engorged larvae were microinjected with *Dome1* or control (*GFP*) dsRNA and analyzed for phenotypic variations in newly molted nymphs. The insets show the whole ticks, and the yellow circles correspond to the highly magnified views of normal legs (blue arrowheads) or malformed legs in *Dome1*-knockdown ticks (red arrows). Results are representative of three independent experiments. Black scale bar = 50  $\mu\text{m}$ , blue scale bar = 200  $\mu\text{m}$ .

**Fig. S11. Dome1 is essential for fecundity and early larval development**

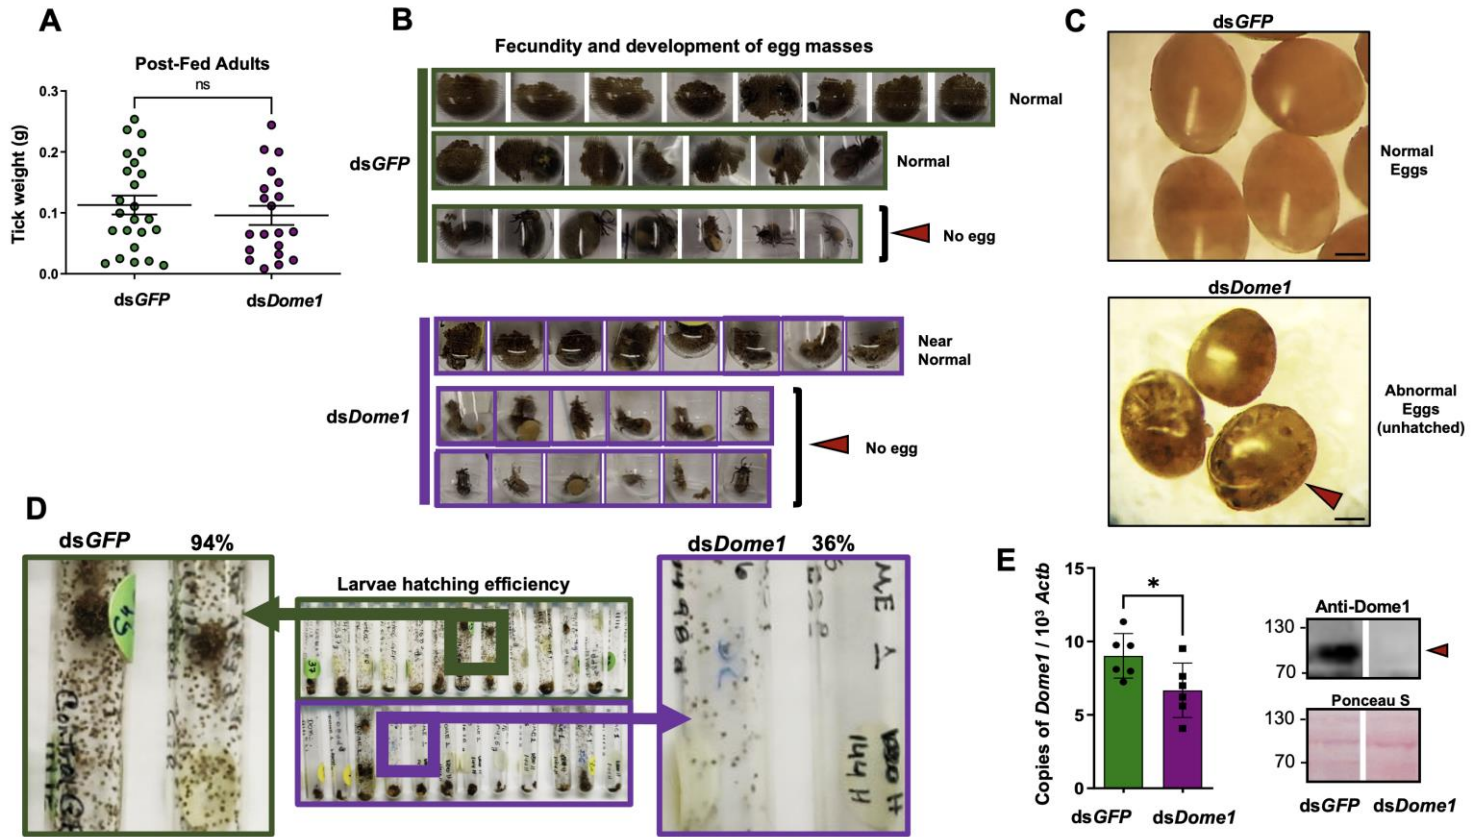

### Fig. S11. *Dome1* is essential for fecundity and early larval development

Adult females of *I. scapularis* (25 ticks per group) were microinjected with ds*Dome1* or ds*GFP* (control) RNA and allowed to engorge on separate groups of rabbits. (A) Knockdown of *Dome1* did not influence optimal tick engorgement. Ticks were weighed immediately after feeding to repletion, with no significant difference recorded between *Dome1*-deficient or control groups. (B) *Dome1* deficiency impacts fecundity and development of egg masses. While most of the egg masses from the control ticks had normal anatomical features, many of the *Dome1*-deficient ticks were unable to lay eggs (arrow) or yielded smaller egg masses. (C) Abnormal egg development in *Dome1*-knockdown ticks. In contrast to the normal morphological features of the eggs laid by control (ds*GFP*-injected) ticks (upper panel), the *Dome1*-deficient females generated eggs with abnormal features (lower panel), most of which remain unhatched (arrow). Scale bar = 20  $\mu$ m. (D) *Dome1* deficiency impairs optimal egg hatching and larval emergence. Most of the eggs laid by control ticks (94%) gave rise to larvae (left panel); however, larval emergence was recorded from a smaller fraction (36%) of the eggs from the *Dome1*-knockdown females (right panel). (E) Knockdown of *Dome1* sustained in newly hatched larvae. The emerged larval masses were processed for *Dome1* mRNA or protein levels by RT-qPCR (left panel) or western blot analyses using anti-*Dome1* antibodies (right panels), respectively. Lower levels of *Dome1* transcripts or *Dome1* protein (red arrow) were observed in the larvae of *Dome1*-knockdown female ticks, as compared to control ticks. Quantitative data are shown as individual data points and means  $\pm$  SDs (n = 6 to 23). \* $P < 0.05$ , determined using two-tailed Mann-Whitney *U* test; ns, non-significant.

**Fig. S12. RNAi-mediated knockdown of *Dome1*, *JAK*, and *STAT* in larval ticks yields comparable developmental defects in newly molted nymphs, impacting blood meal engorgement of *B. burgdorferi*-infected ticks and spirochete transmission.**

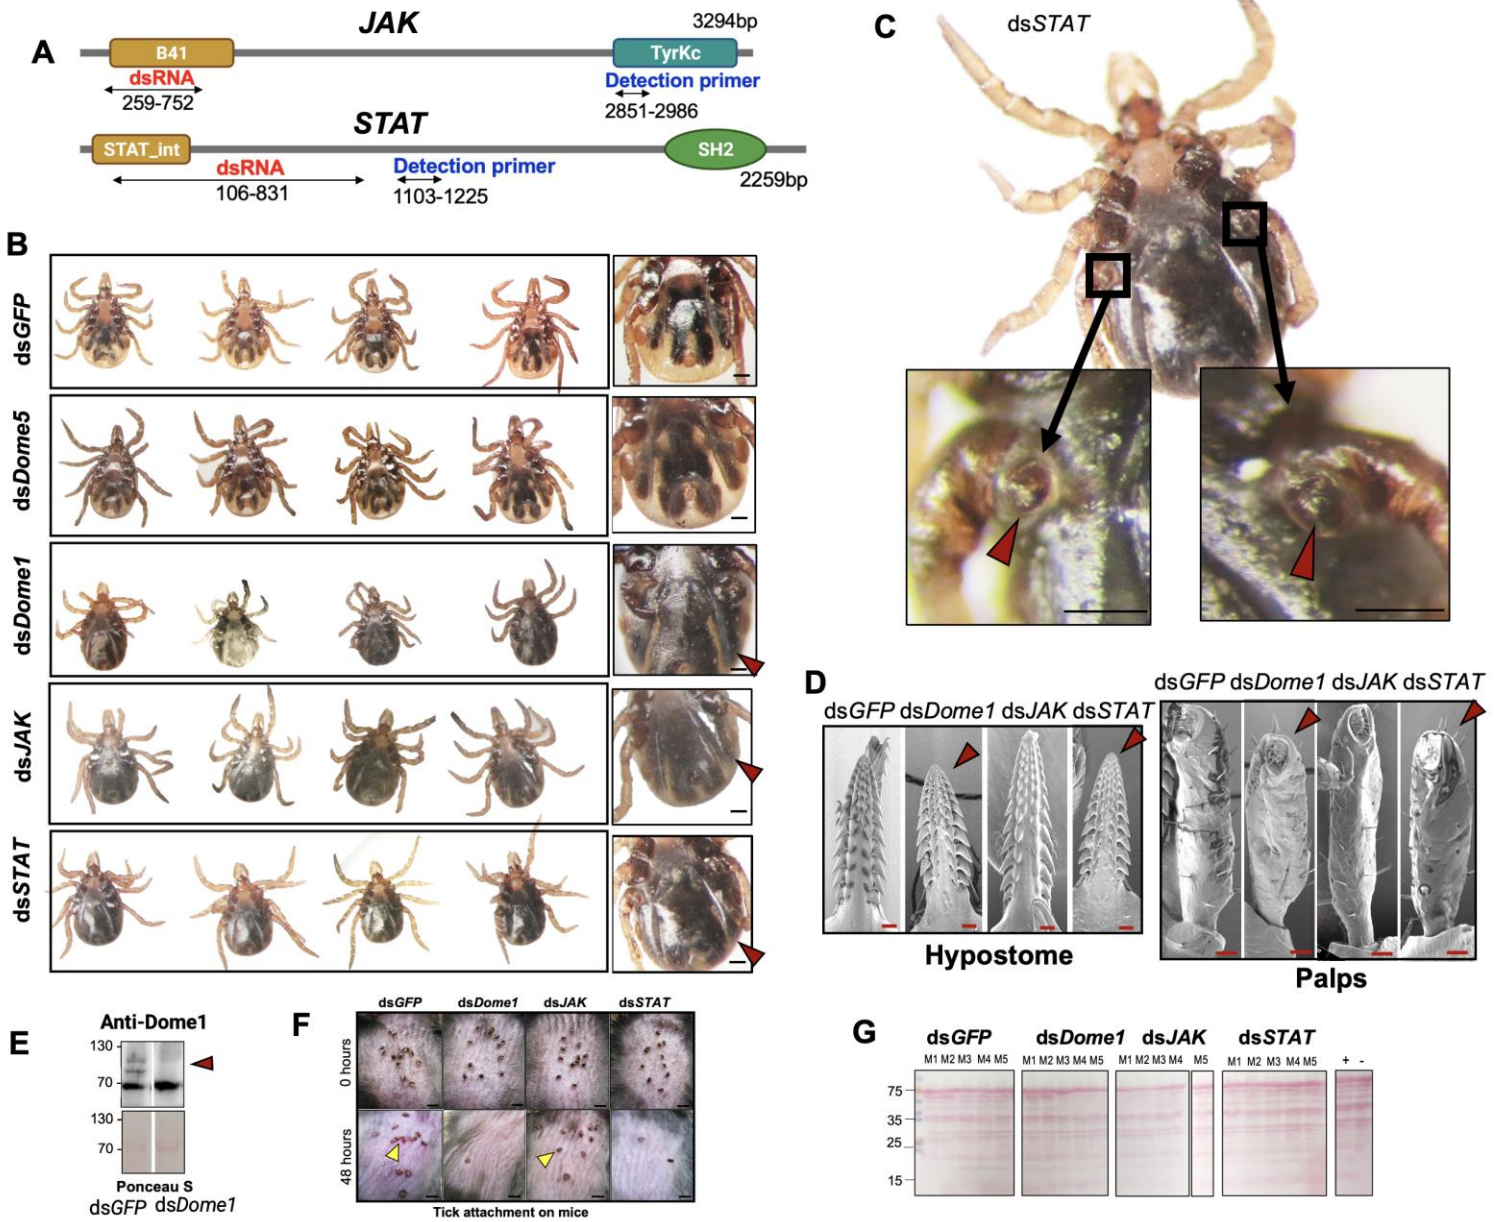



**Fig. S12. RNAi-mediated knockdown of *Dome1*, *JAK*, and *STAT* in larval ticks yields comparable developmental defects in newly molted nymphs, impacting blood-meal engorgement of *B. burgdorferi*-infected ticks and spirochete transmission.**

(A) Schematic representation of the *JAK* and *STAT* open reading frames, showing regions targeted for RNAi. Detection primers were used for the assessment of transcript silencing using RT-qPCR. Abbreviations: B41, Band 4.1 homolog; TyrKc, tyrosine kinase catalytic domain; STAT\_int, protein interaction domain; SH2, Src homology 2 domain. (B) Separate groups of fed larvae were microinjected with ds*Dome1*, ds*JAK*, or ds*STAT*; control ticks were microinjected with either ds*GFP* or ds*Dome5* RNA. The larvae were allowed to molt and were then analyzed as newly molted unfed nymphs. Viable ticks were imaged under a dissecting binocular microscope, which showed comparable developmental defects, including darker abdomens (arrows), in *Dome1*-, *JAK*-, or *STAT*-knockdown ticks, while the control *Dome5*-knockdown or ds*GFP*-injected nymphs had normal appearances. (C) A representative *STAT*-knockdown tick showing an additional defect of rudimentary legs (arrow). Scale bar = 50  $\mu$ m. (D) Close-up view of the morphological defects highlighted in Fig. 3, indicating shorter hypostome and pulps in ds*Dome1* and ds*STAT* groups (arrowheads), as compared to controls (ds*GFP*). (E) (A) Transstadial knockdown of *Dome1*, *JAK*, and *STAT* in infected unfed nymphs. Larvae that had engorged on *B. burgdorferi*-infected mice were microinjected with target dsRNA and allowed to molt. Reduced *Dome1* levels (arrowhead) were observed in knockdown ticks, as assessed by immunoblotting. (F) Attachment of knockdown ticks on mice during spirochete transmission, as detailed in Fig 8. Nymphs (12 ticks per group) were allowed to engorge on naïve mice (scale bar = 1 mm). Tick attachment was observed at various time points until repletion. (G) Equal protein loading, as assessed by Ponceau S, are shown for the representative immunoblot shown in Fig. 8G. Results are representative of two to three independent experiments.

**Fig. S13. Suppression of *I. scapularis* JAK-STAT pathway impacts tick metamorphosis and gut homeostasis**

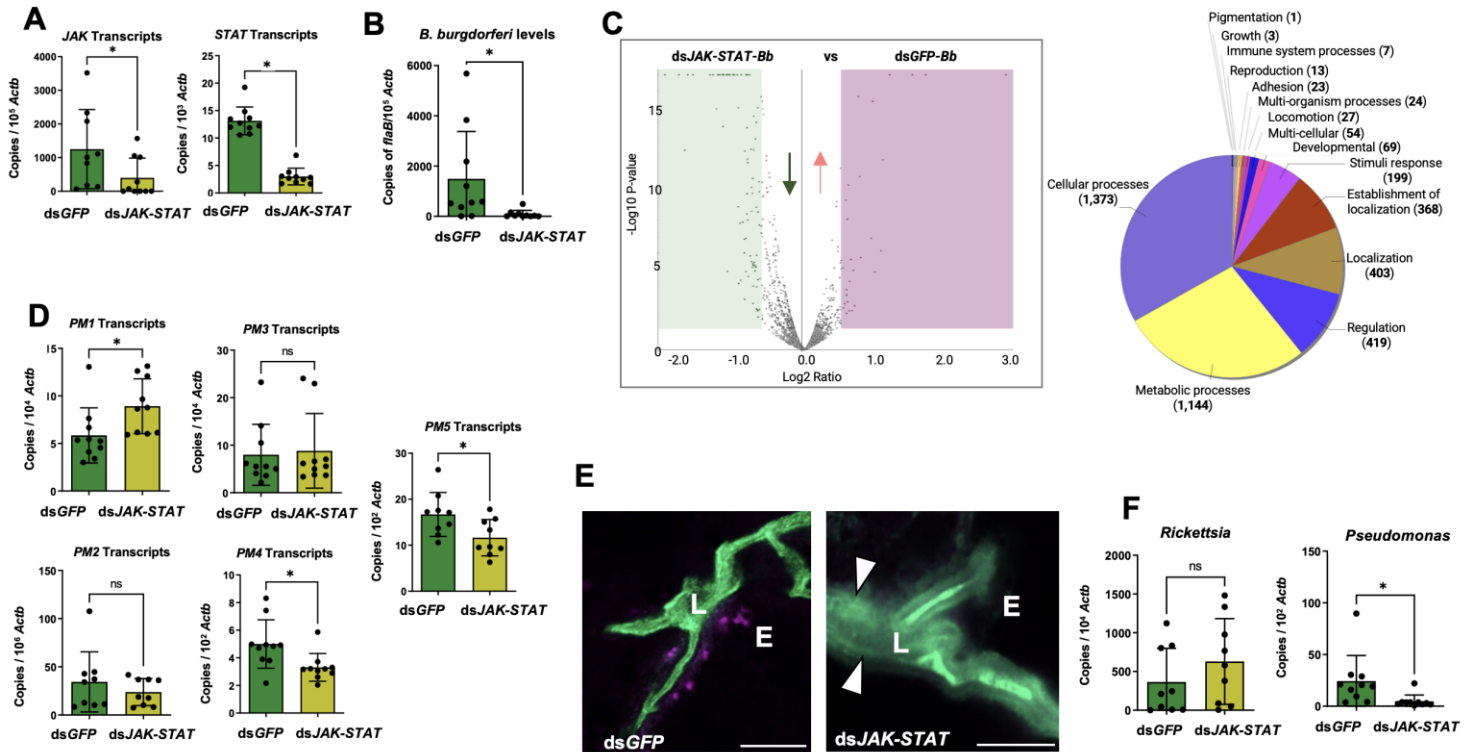

**Fig. S13. Suppression of *I. scapularis* JAK–STAT pathway impacts tick metamorphosis and gut homeostasis**

(A) Simultaneous knockdown of *JAK* and *STAT* expression by RNAi in nymphal ticks. Separate groups of nymphs (20 ticks per group) were microinjected with ds*JAK* and ds*STAT* (ds*JAK-STAT*) or control ds*GFP* RNA (4 µg/µl) and then fed on naive mice for 48 hours. The partially fed ticks were processed for *JAK* and *STAT* mRNA levels using specific primers and normalizing against tick *Actb* levels. (B) Suppression of JAK–STAT pathway impairs the colonization of *B. burgdorferi* within the tick gut. Dissected guts from nymphs that had partially engorged on *B. burgdorferi*-infected C3H mice were processed for RT-qPCR via measuring *flaB* transcripts and normalizing to tick *Actb*. (C) Differential production of gut proteins in *JAK–STAT*-knockdown ticks. Sets of proteins that are significantly up- or downregulated in *JAK–STAT*-knockdown ticks were identified using isobaric tandem mass tag (TMT) multiplexed quantitative proteomics. The most dramatically up- or downregulated proteins are indicated by the shaded purple or green areas, respectively (left panel). The number of identified proteins involved in predicted biological processes are indicated by the pie chart (right panel). (D) Suppression of JAK–STAT pathway alters expression of peritrophin genes, including *PM5*. The mRNA levels of five peritrophins were analyzed by RT-qPCR in 48-hour-fed ticks. (E) Alteration of peritrophic matrix (PM) permeability in *JAK–STAT*-knockdown ticks. Confocal microscopy was performed to analyze 48-hour-fed nymph guts (previously microinjected with ds*JAK-STAT* or ds*GFP* RNA) that were capillary fed with fluorescein-conjugated 500,000 (green) and rhodamine red-conjugated 10,000 (violet) MW dextran molecules. While the PM was impermeable to high molecular weight dextran beads, which were confined within the lumen of control ticks, the beads crossed the PM barrier and endocytosed inside some gut epithelial cells in *JAK–STAT*-

knockdown ticks (arrows). L, lumen; E, epithelial cells. Scale bar = 10  $\mu\text{m}$ . (F) *JAK-STAT*-knockdown alters selected microbial species in ticks. *JAK-STAT*-knockdown or control (ds*GFP*) ticks were allowed to partially engorge on *B. burgdorferi*-infected mice. Nymphal guts were analyzed via RT-qPCR targeting selected microbial species. Quantitative data are shown as individual data points and means  $\pm$  SDs (n = 3 to 9). \* $P < 0.05$ , determined using two-tailed Mann-Whitney *U* test; ns, non-significant.

Fig. S14. Host IFN- $\gamma$  influences cell proliferation in nymphal gut

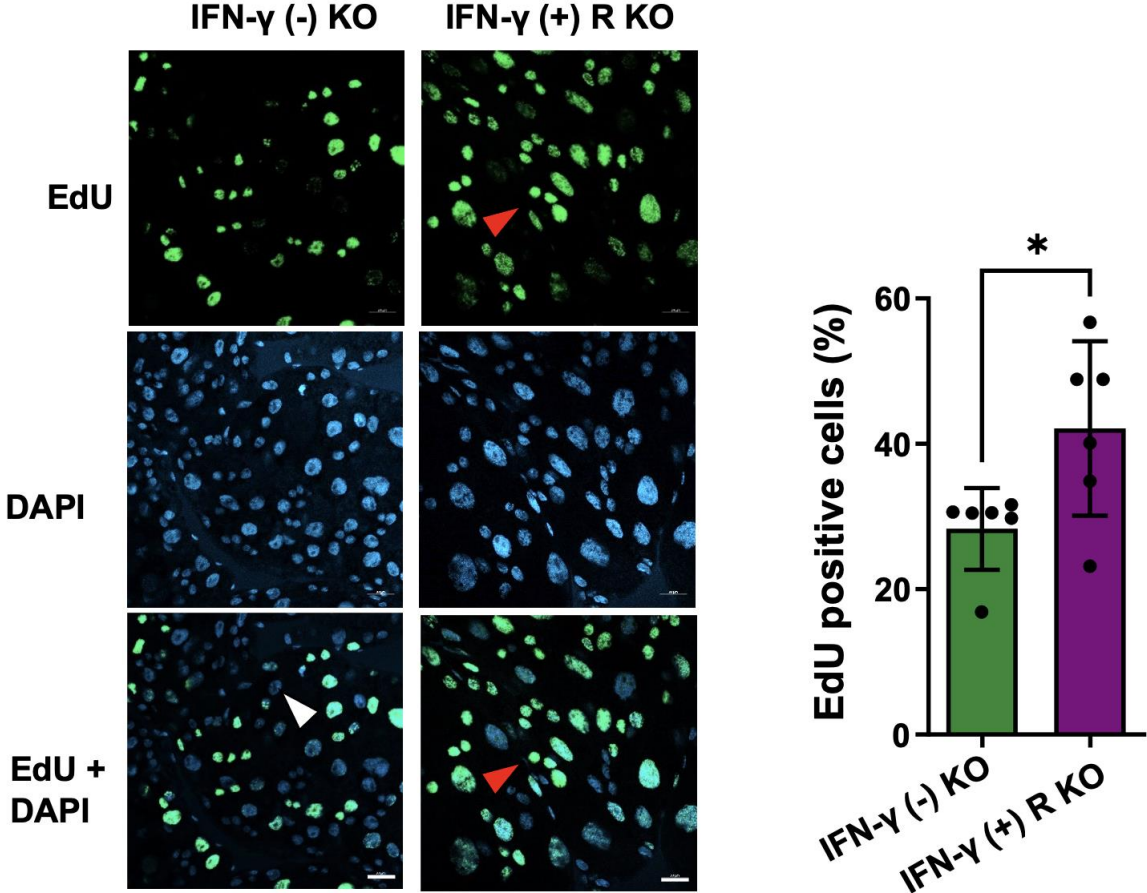

**Fig. S14. Host IFN- $\gamma$  influences cell proliferation in nymphal gut**

Groups of IFN- $\gamma$ -producing or -deficient mice, as described in Fig. 3, were allowed to be parasitized by nymphs for 48 hours, and were then assessed for 5-ethynyl-2'-deoxyuridine (EdU) incorporation, as detailed in Fig. 7. The dissected guts were imaged by confocal microscopy (left panels). A significant reduction in proliferative (EdU positive) cells was observed in ticks that fed on IFN- $\gamma$ -deficient mice (white arrow), whereas these cells were more abundant in nymphs that fed on IFN- $\gamma$ -producing mice (red arrow). The tick gut cellular nuclei were labeled with DAPI (blue) or EdU (green). The EdU positive cells from a group of six ticks were enumerated under a confocal microscope (right panel), confirming a significant reduction in proliferative cells in ticks that fed on IFN- $\gamma$ -deficient mice. Results are representative of two independent experiments. Quantitative data are shown as individual data points and means  $\pm$  SDs ( $n = 6$ ). Scale bar = 10  $\mu\text{m}$ ,  $*P < 0.05$ , determined using two-tailed Mann–Whitney  $U$  test.

**Fig. S15. *Dome1* function in subadult development involves Notch–Delta pathway through *Hox* transcription factors**

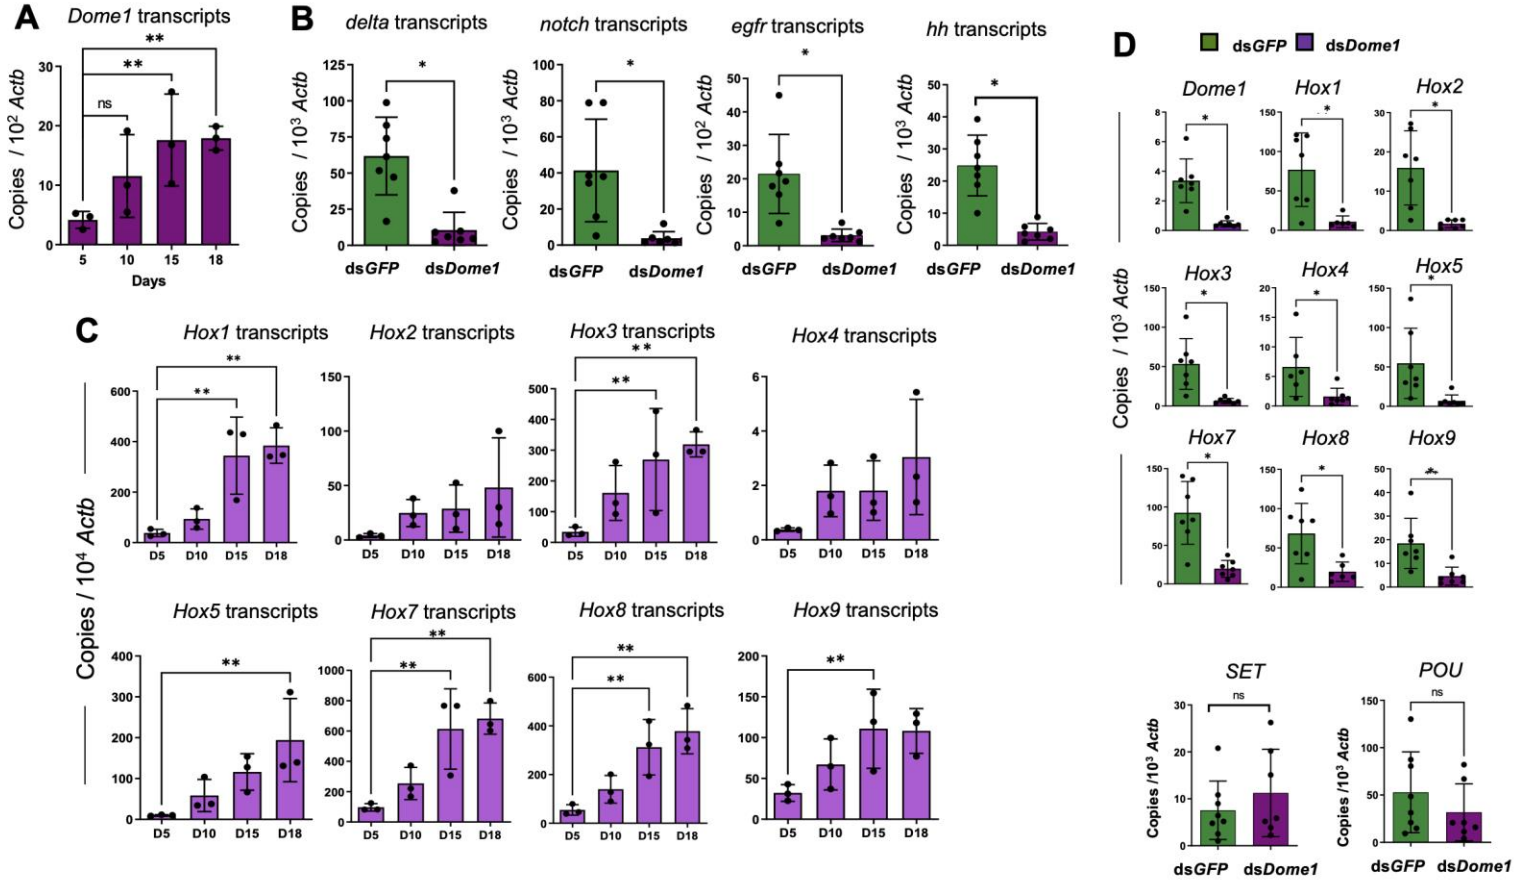

**Fig. S15. *Dome1* function in subadult development involves Notch–Delta pathway through *Hox* transcription factors**

(A) Enhanced *Dome1* expression during early larva-to-nymph molting. The relative levels of *Dome1* transcripts in fed larval ticks were analyzed by RT-qPCR at various time points (5, 10, 15, and 18 days after blood meal engorgement). Each dot represents a pool of three larval ticks.  $**P < 0.05$ , determined using one-way ANOVA. (B) The knockdown of *Dome1* impairs major transcription factors and signaling pathways related to development. The expression levels of representative target transcripts were analyzed by RT-qPCR during the larva-to-nymph intermolt stage, specifically 15 days after larval blood meal engorgement (8 ticks per group). The transcript levels of *delta*, *notch*, *epidermal growth factor receptor (egfr)*, and *Hedgehog (hh)* were significantly reduced in *Dome1*-knockdown larvae. (C) Expression of identified *Hox* genes. The *Hox* genes were analyzed in engorged larval ticks at various time points (5, 10, 15, and 18 days after larval blood meal engorgement) (3 ticks per group).  $**P < 0.05$ , determined using one-way ANOVA. (D) The knockdown of *Dome1* impairs the expression of *Hox* genes. The expression levels of the *Hox* genes were analyzed as detailed in panel C. Notably, the expression of all eight *Hox* genes were significantly downregulated in *Dome1*-knockdown ticks, as compared to control (dsGFP) ticks, whereas the mRNA levels of the other tested transcription factors, like *SET* or *POU*, remained unaltered (bottom panels). Results are representative of two independent experiments. Quantitative data are shown as individual data points and means  $\pm$  SDs (n = 3 to 7).  $*P < 0.05$ , determined using two-tailed Mann–Whitney *U* test; ns, non-significant.



**Fig. S16. RNAi-mediated knockdown of *Hedgehog* yields severe developmental defects in the organs of newly molted nymphs**

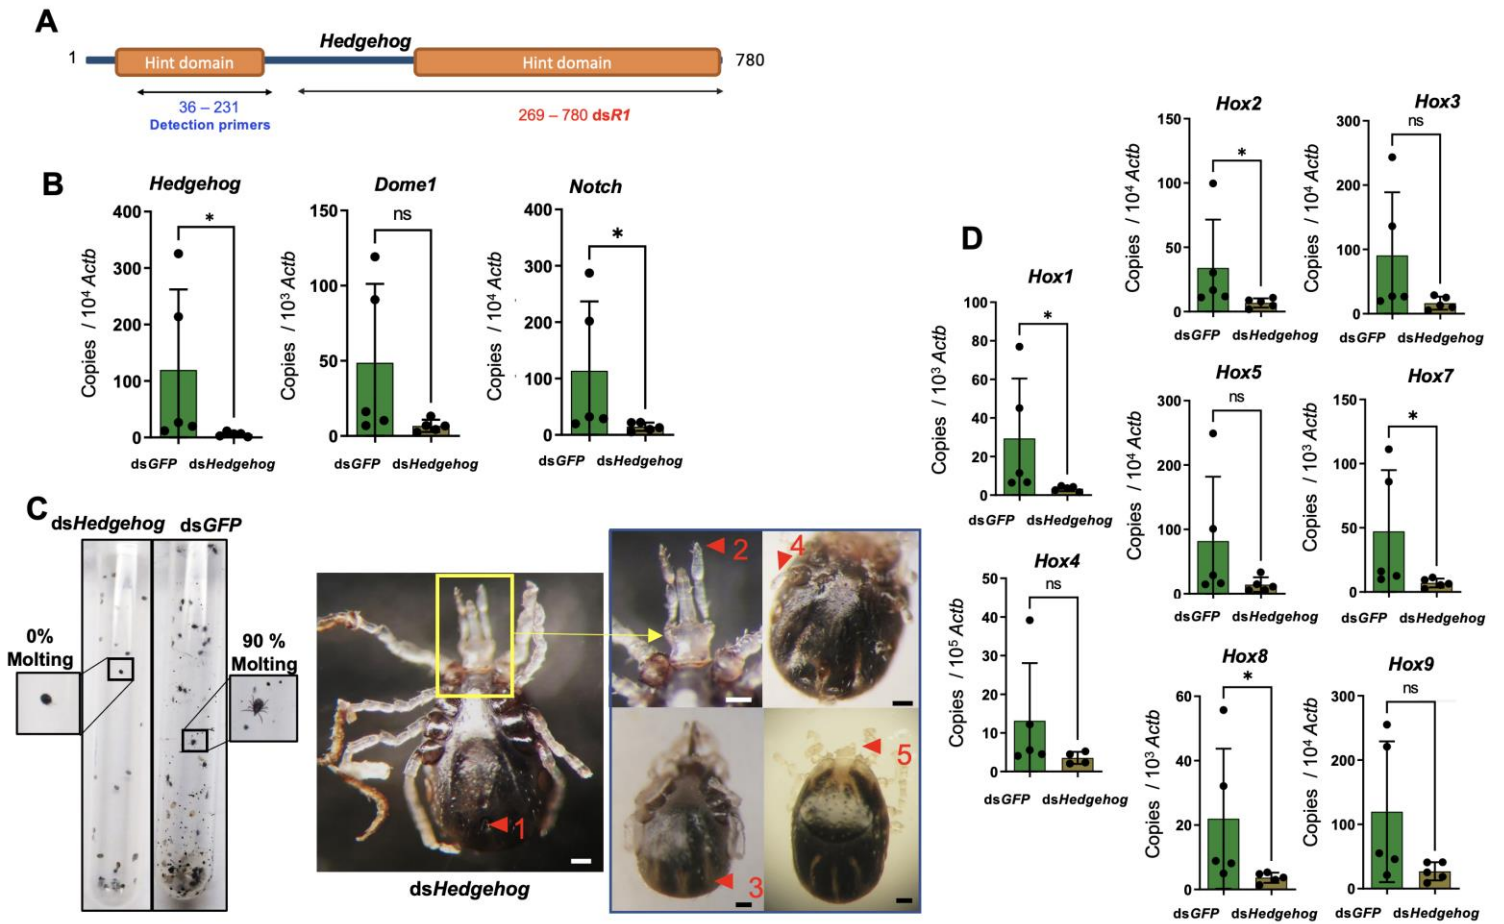

**Fig. S16. RNAi-mediated knockdown of *Hedgehog* yields severe developmental defects in the organs of newly molted nymphs**

(A) Schematic representation of the *Hedgehog* open reading frame showing regions targeted for RNAi. The regions encompassing the dsRNA construct (ds*R1*, red) and detection primers (blue) are shown. (B) The knockdown of *Hedgehog* in larval ticks. Groups of fed larvae (25 ticks per group) were microinjected either with ds*Hedgehog* or control ds*GFP* RNA (4 µg/µl) and then fed on *B. burgdorferi*-infected mice. The intermolt ticks were then processed for RT-qPCR assessment of mRNA levels using gene-specific primers, normalizing against tick *Actb* levels. (C) *Hedgehog*-knockdown ticks were unable to molt. The fed knockdown larvae, as detailed in panel B, were allowed to molt, and were then analyzed as newly molted unfed nymphs. None of the *Hedgehog*-knockdown ticks were able to molt, whereas 90% of the control (ds*GFP*) ticks successfully molted to nymphs. The right panels show intermolt *Hedgehog*-knockdown ticks displaying deformities, such as a defective anal pore (1), malformed mouthparts (2), darker abdomen (3), abnormal legs (4), and sometimes the complete loss of mouthparts (5). These developmental defects are comparable to *Dome1*-, *JAK*-, or *STAT*-knockdown ticks (Fig. 4, fig. S10, and fig. S12). Scale bar (black or white) = 50 µm. (D) The knockdown of *Hedgehog* impairs several *Hox* transcription factors related to the *Hedgehog* signaling pathway for development. The expression of target transcripts were analyzed by RT-qPCR during the larva-to-nymph intermolt stage, specifically 15 days after larval blood meal engorgement (8 ticks per group). The transcript levels of *Hox1*, *Hox2*, *Hox7*, and *Hox8* were significantly reduced in *Hedgehog*-knockdown larvae. Results are representative of two independent experiments. Quantitative data are shown as individual data points and means ± SDs (n = 5 to 50). \**P*<0.05, determined using two-tailed Mann–Whitney *U* test; ns, non-significant.

**Fig. S17. Conservation of Dome1–JAK–STAT signaling components across genomes of major tick vectors**

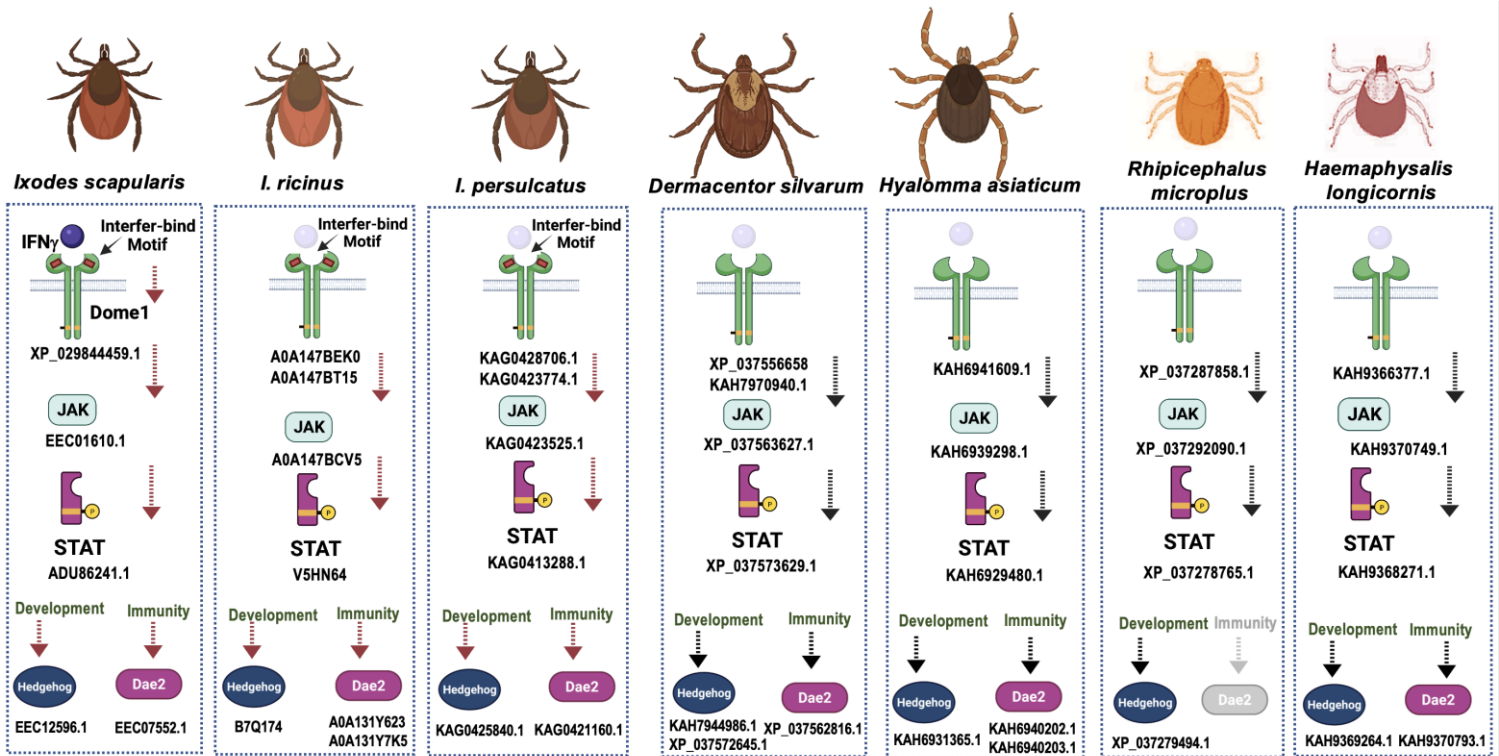

**Fig. S17. Conservation of Dome1–JAK–STAT signaling components across genomes of major tick vectors**

Orthologs of Dome1 and associated representative signaling components relevant to arthropod development and immunity, such as JAK, STAT, Hedgehog, and Dae2, were searched across major databases. Their presence in these databases, including their accession numbers, are indicated by colored diagrams. Except for the apparent absence of Dae2 (gray image) in *Rhipicephalus microplus*, these signaling components are identifiable in all major tick species. The interfer-bind motif that binds IFN- $\gamma$  is mostly conserved in all examined *Ixodes* spp. ticks.

Fig. S18. Primary sequence alignment of Dome1 orthologs in representative tick species

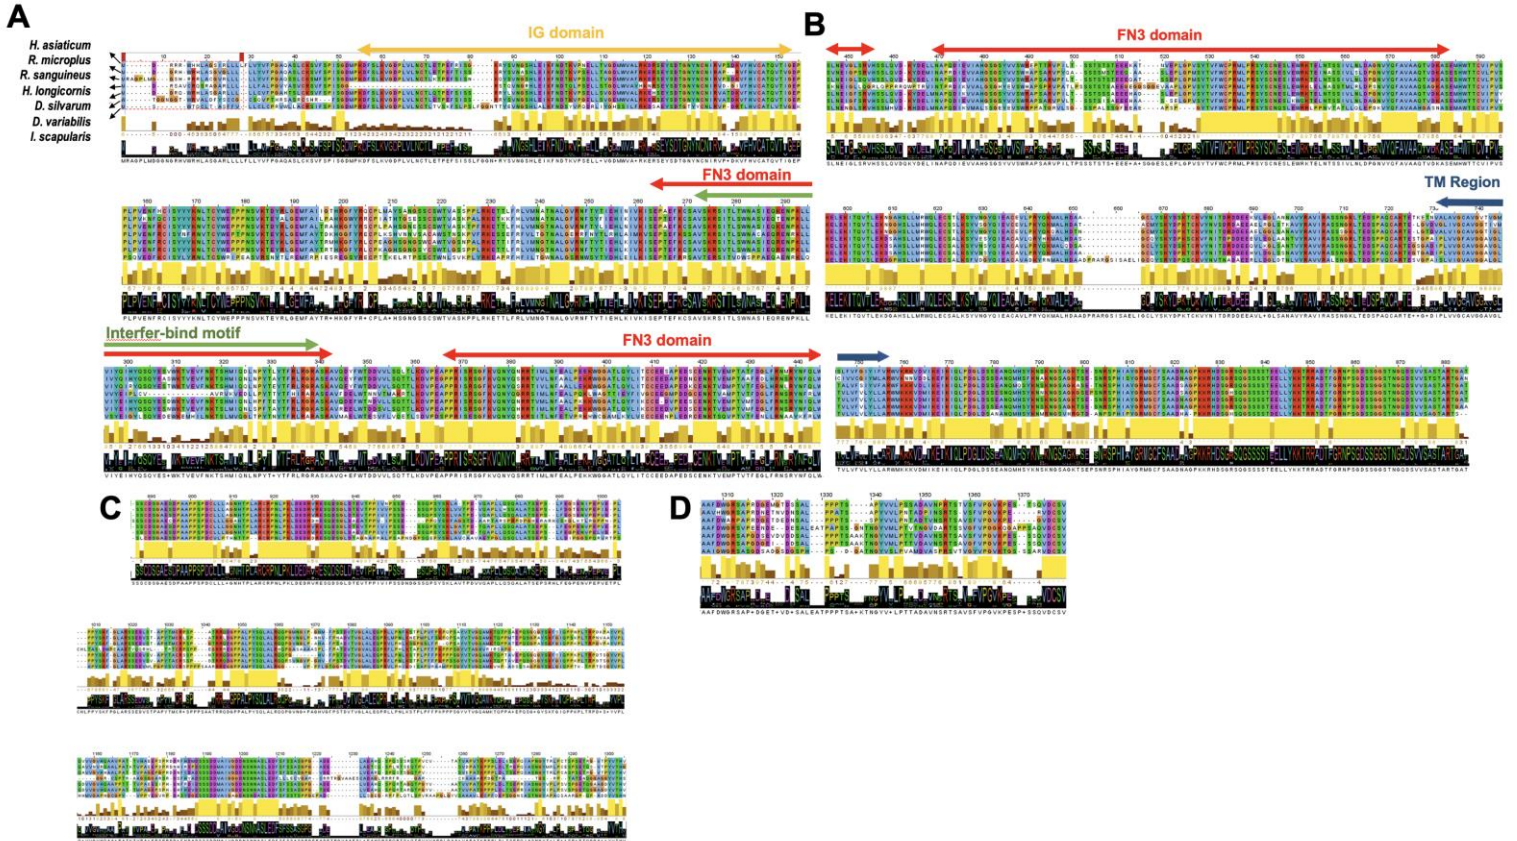

**Fig. S18. Primary sequence alignment of Dome1 orthologs in representative tick species**

The amino acid sequence homology between Dome homologs from *Ixodes scapularis* and the following other tick species are indicated: *Hyalomma asiaticum*, *Rhipicephalus microplus*, *R. sanguineus*, *Haemaphysalis longicornis*, *Dermacentor silvarum*, and *D. variabilis*. Amino acids with similar properties are labeled with identical colors. The locations of the identifiable domains, including the IG domain, interfer-bind motif, three fibronectin type-III (FN3) domains, transmembrane (TM) domain, and the rest of the cytoplasmic regions are shown. The panels A-D represent the sequential sequence alignments, starting from the amino termini through the carboxyl termini of these sequences, as detailed in the Materials and Methods section.

**Fig. S19. Dome1 orthologs are expressed in non-*Ixodes* ticks during tick engorgement on hosts**

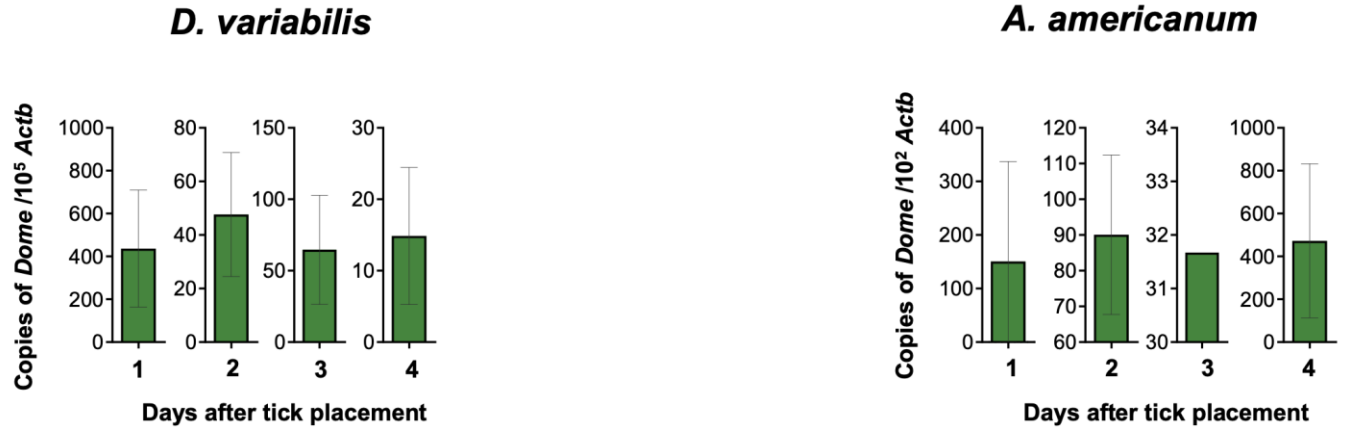

**Fig. S19. Dome1 orthologs are expressed in non-*Ixodes* ticks during tick engorgement on hosts**

Temporal expression of *Dome1* ortholog in the American dog tick, *D. variabilis* (left panel), and the lone star tick, *A. americanum* (right panel). Nymphs were allowed to parasitize guinea pigs, and partially fed ticks were then collected at various time points during feeding between day 1 to day 4. *Dome* transcript levels were analyzed by RT-qPCR. An independent experiment is shown (n = 7 to 50).



**Fig. S20. *Dome1* ortholog in *D. variabilis* supports tick gut cellular proliferation and microbial homeostasis**

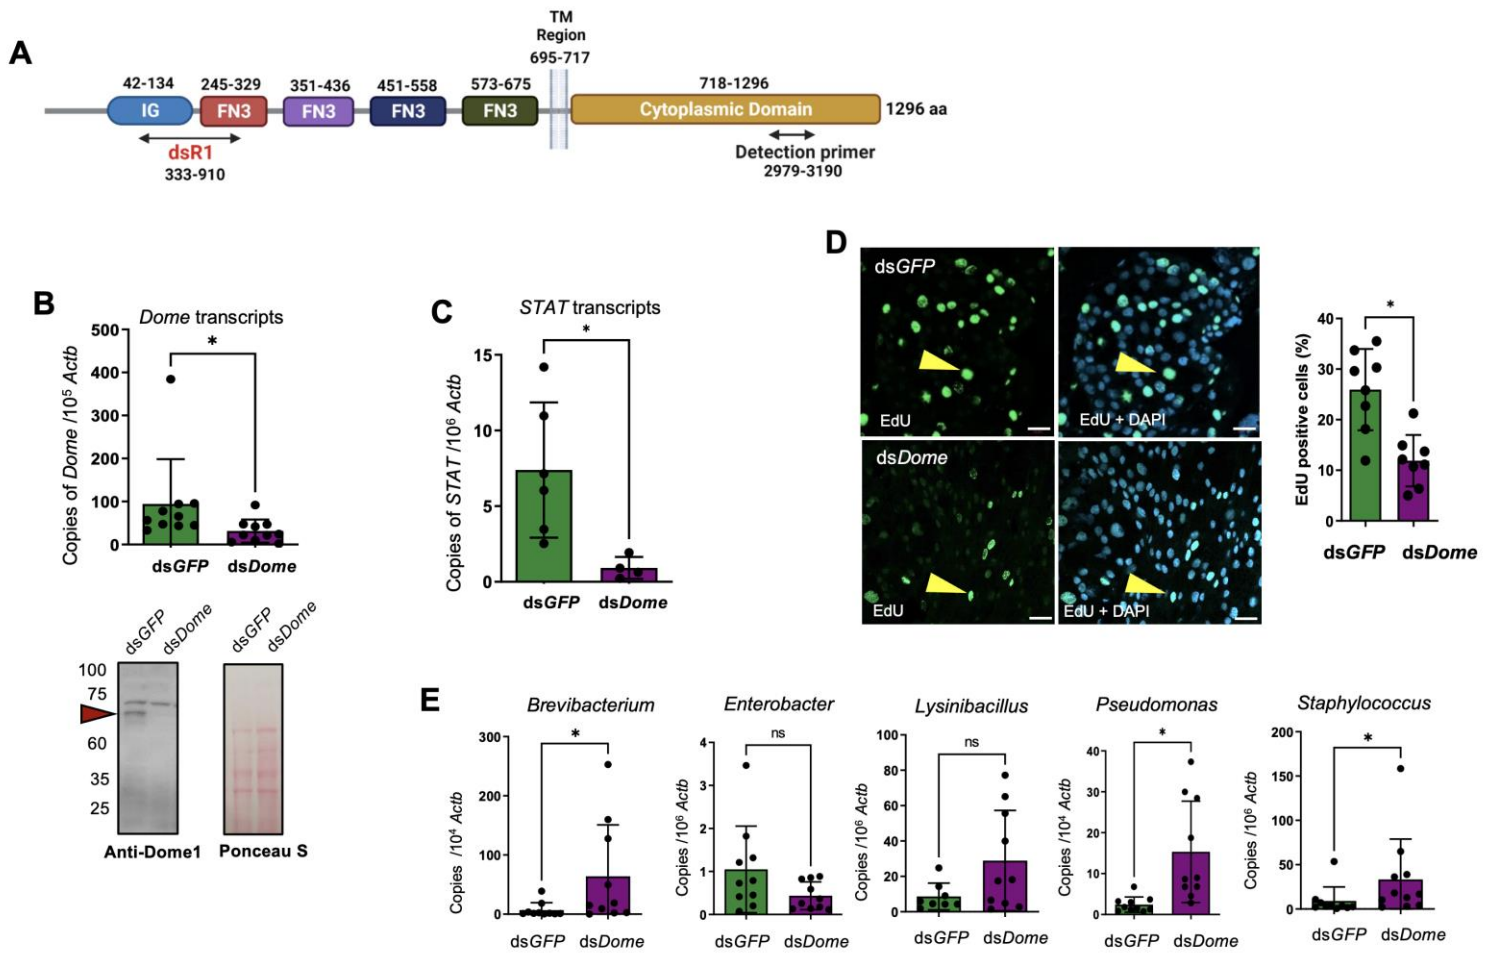

**Fig. S20. *Dome1* ortholog in *D. variabilis* supports tick gut cellular proliferation and microbial homeostasis**

(A) Schematic diagram showing features of *Dome1* ortholog in *D. variabilis*, designated as *Dome*. The domains (IG, four fibronectin type-III [FN3], transmembrane [TM], and cytoplasmic) with amino acid (aa) positions indicated. The regions (including nucleotide positions) for RNAi (ds*R1*) as well as detection primers used for the assessment of transcript silencing via RT-qPCR analysis are shown. (B) The knockdown of *Dome* in *D. variabilis* nymphs. Ticks (30 per group) were microinjected with ds*Dome* or control ds*GFP* RNA (4 µg/µl) and then fed on guinea pigs for 72 hours. The partially fed ticks were processed for *Dome* mRNA levels using specific primers and normalizing against tick *Actb* levels (upper panel). The level of *Dome* protein in *D. variabilis* was analyzed by western blotting using polyclonal antibodies generated against *I. scapularis* *Dome1* (lower panel). The arrow denotes the *Dome* ortholog in *D. variabilis*. (C) Knockdown of *Dome* in *D. variabilis* downregulates *STAT* expression. The partially fed ticks were processed for mRNA levels using specific primers and normalizing against tick *Actb* levels. (D) Cell proliferation in the nymphal *D. variabilis* gut. Nymphal ticks fed on guinea pigs for 72 hours to initiate gut cell proliferation. Next, nymphs were collected, microinjected with EdU (green), and allowed to rest while the fluorescent nucleoside analog was incorporated into tick DNA. The tick guts were then dissected and imaged by confocal microscopy. Proliferative EdU positive cells are shown by arrows. The EdU positive cells from a group of seven ticks were enumerated under a confocal microscope (right panel), confirming a severe reduction in proliferative cells in *Dome*-knockdown ticks. The tick nuclei were labeled using DAPI (blue). Scale bar = 20 µm. (E) *Dome* knockdown imparts alterations in microbial homeostasis in the *D. variabilis* gut. Ticks were allowed to partially

engorge on guinea pigs. Dissected guts from individual nymphs were analyzed via RT-qPCR targeting 16S rRNA transcripts from representative microbial species. Results are representative of two independent experiments. Quantitative data are shown as individual data points and means  $\pm$  SDs (n = 6 to 9). \* $P < 0.05$ , determined using two-tailed Mann–Whitney  $U$  test; ns, non-significant.

**Fig. S21. Alternate dsRNA strategy for independent *Dome1* knockdown did not alter other *Dome* homologs, yet imparted similar phenotypic defects observed for primary dsRNA constructs**

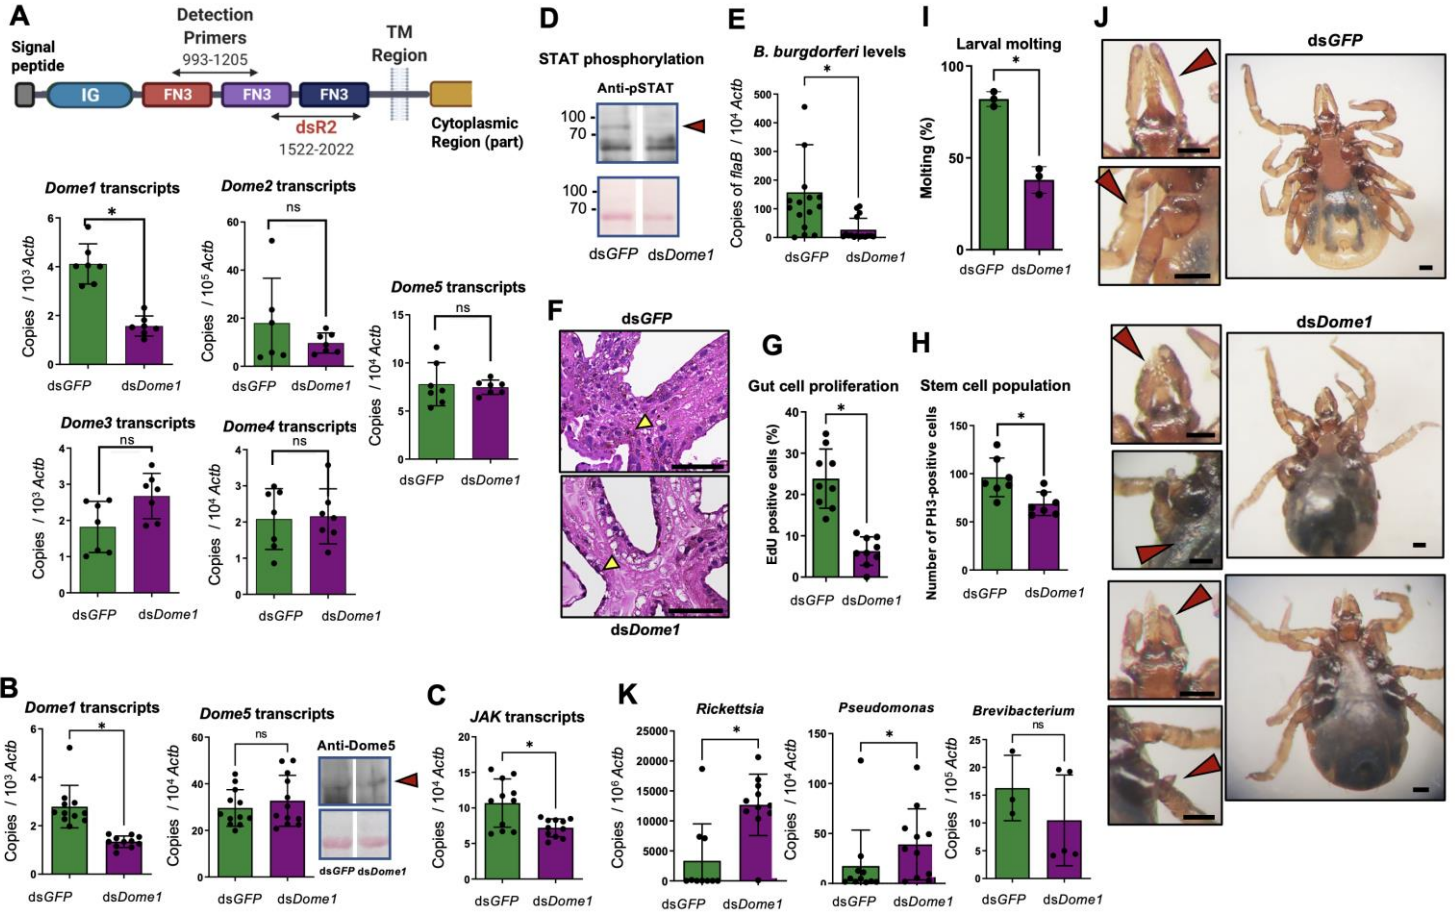

**Fig. S21. Alternate dsRNA strategy for independent *Dome1* knockdown did not alter other *Dome* homologs, yet imparted similar phenotypic defects observed for primary dsRNA constructs**

(A) Schematic representation of the *Dome1* open reading frame, showing regions targeted for RNAi (upper panel), including the alternate dsRNA construct (dsR2). The lower panels denote the selective knockdown of *Dome1* irrespective of any impact on other *Dome* homologs. (B) *Dome1* knockdown did not influence expression of *Dome5* mRNA or protein (arrow) levels. (C) *Dome1* knockdown impairs *JAK* expression, as shown by RT-qPCR. (D) *Dome1* knockdown reflects decreased levels of phosphorylated STAT (arrow), as shown by immunoblotting (upper panel). Equal protein loading was evidenced by Ponceau S staining (lower panel). (E) Knockdown of *Dome1* impairs *B. burgdorferi* levels within the tick gut, as examined via measuring *flaB* transcripts and normalizing to tick *Actb* using RT-qPCR. (F to H) *Dome1* knockdown reduces the proliferation of gut cells, as revealed by histological analysis (panel F), incorporation of EdU (panel G), and assessment of gut stem cells (panel H), using methods detailed in Fig. 7. Scale bar = 100  $\mu$ m. (I) *Dome1* knockdown affects larva-to-nymph molting. Fed knockdown larvae, as detailed in panel A, were allowed to molt and then enumerated. (J) *Dome1* knockdown influences proper development of nymphs, as imaged under a dissecting binocular microscope, showing severe phenotypic deformities, including abnormal hypostomes and legs (red arrowheads). Scale bar = 50  $\mu$ m. (K) *Dome1* knockdown alters tick gut microbiota. Ticks partially engorged on *B. burgdorferi*-infected mice and gut samples were analyzed via RT-qPCR using 16S rRNA targeting selected bacterial genera. Results are representative of two to three independent experiments. Quantitative data are shown as individual data points and means  $\pm$  SDs (n = 7 to 50) \* $P$ <0.05, determined using two-tailed Mann–Whitney  $U$  test; ns, non-significant.

**Table S1: Differentially produced proteins between *B. burgdorferi*-infected and naïve controls (both tick groups injected with dsGFP)**

| Accession number | Description                                                      | Abundance Ratio (%): (Infected dsGFP) / (Naïve dsGFP) |
|------------------|------------------------------------------------------------------|-------------------------------------------------------|
| A0A4D5RRR3       | Tetraspanin                                                      | 7.261                                                 |
| M4PN64           | Cytochrome c oxidase subunit 1 (Fragment)                        | 5.992                                                 |
| A0A4D5SB93       | Putative low-density lipoprotein receptor (Fragment)             | 2.902                                                 |
| A0A4D5RHI9       | Putative epithelial chloride channel protein                     | 2.27                                                  |
| A0A4D5RU19       | Putative nucleolar and coiled-body phosphoprotein 1 (Fragment)   | 2.261                                                 |
| B7P3D1           | Tpr and ank domain-containing protein, putative                  | 2.229                                                 |
| A0A4D5RZX3       | Putative dehydrogenase (Fragment)                                | 2.136                                                 |
| A0A4D5S3U1       | Putative molecular chaperone distantly (Fragment)                | 2.072                                                 |
| B7QKR4           | 25 kDa salivary gland protein C, putative                        | 2.059                                                 |
| B7PJA0           | Secreted protein, putative                                       | 2.042                                                 |
| A0A4D5RQP0       | Putative conserved secreted protein (Fragment)                   | 2.011                                                 |
| A0A4D5RQS3       | SF3 helicase domain-containing protein (Fragment)                | 1.986                                                 |
| A0A4D5S5L7       | Putative acyl-coa synthetase (Fragment)                          | 1.866                                                 |
| B7P3V7           | Uncharacterized protein                                          | 1.765                                                 |
| B7PFF0           | Secreted protein, putative                                       | 1.748                                                 |
| B7PPE2           | Tnf receptor associated factor, putative (Fragment)              | 1.733                                                 |
| B7Q203           | ATPase, putative                                                 | 1.729                                                 |
| B7P3N0           | Protein disulfide isomerase 3, putative (Fragment)               | 1.718                                                 |
| A0A4D5RV46       | Putative cytochrome p450 cyp3/cyp5/cyp6/cyp9 subfamily protein   | 1.707                                                 |
| A0A4D5S320       | Putative nicotinamide n-methyltransferase (Fragment)             | 1.701                                                 |
| A0A4D5RAF8       | Putative presenilins-associated rhomboid-like protein (Fragment) | 1.683                                                 |
| A0A4D5RY03       | Putative tick transposon (Fragment)                              | 1.645                                                 |
| A0A4D5RQ02       | Uncharacterized protein (Fragment)                               | 1.638                                                 |
| B7Q2B6           | Secreted salivary gland peptide, putative                        | 1.636                                                 |
| A0A4D5RVD6       | Putative lipoprotein amino terminal region                       | 1.62                                                  |
| B7QHR8           | Zinc/iron transporter, putative                                  | 1.611                                                 |
| B7QBB4           | Uncharacterized protein                                          | 1.604                                                 |

|            |                                                                                     |       |
|------------|-------------------------------------------------------------------------------------|-------|
| B7QNY6     | Serine proteinase inhibitor serpin-3, putative                                      | 1.593 |
| A0A4D5RUL4 | Putative serine proteinase inhibitor                                                | 1.591 |
| A0A4D5RBQ9 | Ig-like domain-containing protein                                                   | 1.588 |
| B7PSV2     | Methyltransf_11 domain-containing protein                                           | 1.585 |
| B7QM70     | Small heat shock protein, putative (Fragment)                                       | 1.577 |
| B7QNV8     | Uncharacterized protein                                                             | 1.574 |
| A0A4D5S0E2 | Phospholipase B-like (Fragment)                                                     | 1.567 |
| B7Q013     | L-allo-threonine aldolase, putative                                                 | 1.557 |
| B7PFB3     | N-methyltransferase, putative (Fragment)                                            | 1.557 |
| A0A4D5RBE8 | Uncharacterized protein (Fragment)                                                  | 1.552 |
| B7PPM4     | Histone-lysine N-methyltransferase, setb1, putative                                 | 1.549 |
| A0A4D5RNU3 | BTB domain-containing protein (Fragment)                                            | 1.545 |
| B7QH07     | Cytoplasmic dynein heavy chain, putative                                            | 1.541 |
| Q95WZ5     | Histamine binding protein                                                           | 1.54  |
| A0A4D5RS29 | Putative atp-dependent rna helicase (Fragment)                                      | 1.532 |
| A0A4D5RMJ7 | Putative tick serine proteinase (Fragment)                                          | 1.527 |
| B7PNH7     | Uncharacterized protein                                                             | 1.523 |
| A0A4D5RM16 | Putative conserved secreted protein (Fragment)                                      | 1.515 |
| A0A4D5REH9 | Putative lipid phosphate phosphatase                                                | 1.515 |
| B7PMF3     | Secreted protein, putative                                                          | 1.505 |
| B7Q1W5     | Elongation factor 1 gamma, putative                                                 | 0.66  |
| B7PS13     | ING (mammalian INhibitor of Growth) family protein (ing3)-like, putative (Fragment) | 0.66  |
| B7PCZ5     | Glutathione synthetase, putative (Fragment)                                         | 0.658 |
| A0A4D5RRW2 | Putative transporter (Fragment)                                                     | 0.649 |
| A0A4D5RST0 | Putative acyl-coa synthetase (Fragment)                                             | 0.638 |
| Q8MVB0     | Truncated secreted metalloprotease                                                  | 0.624 |
| B7PLJ6     | Glycerol-3-phosphate dehydrogenase [NAD(+)]                                         | 0.621 |
| A0A088CQT2 | Cytochrome c oxidase subunit 1 (Fragment)                                           | 0.617 |
| B7PAY9     | Calbindin-32, putative                                                              | 0.61  |
| A0A4D5RLE2 | Putative fructose-16-bisphosphatase (Fragment)                                      | 0.603 |
| B7P7W6     | Innexin                                                                             | 0.602 |
| B7PJW6     | Chitin deacetylase 9, putative                                                      | 0.594 |
| B7P1H9     | Neurotrimin, putative (Fragment)                                                    | 0.592 |
| A0A4D5RQN5 | Putative secreted protein (Fragment)                                                | 0.568 |
| B7Q265     | Sphingomyelin phosphodiesterase, putative (                                         | 0.565 |

|            |                                                                                        |       |
|------------|----------------------------------------------------------------------------------------|-------|
| A0A4D5RJ63 | Putative muscle m-line assembly protein unc-89                                         | 0.564 |
| B7Q1Z5     | Uncharacterized protein                                                                | 0.559 |
| A0A1S4KT52 | WD-repeat protein, putative                                                            | 0.554 |
| A0A4D5RD42 | Putative eukaryotic translation initiation factor 4 gamma 1-like isoform x2 (Fragment) | 0.529 |
| Q4PMP3     | Putative secreted salivary protein                                                     | 0.501 |
| A0A4D5S981 | CRAL_TRIO_N domain-containing protein (Fragment)                                       | 0.476 |
| A0A4D5RT62 | Putative glutathione s-transferase (Fragment)                                          | 0.449 |
| A0A4D5RU61 | Putative hydroxysteroid 17-beta dehydrogenase 11 (Fragment)                            | 0.225 |



**Table S2: Differentially produced proteins between *Dome1*-knockdown and control (ds*GFP*-injected) ticks**

| Accession number | Description                                                 | Abundance Ratio (%): (ds <i>Dome1</i> ) / (ds <i>GFP</i> ) |
|------------------|-------------------------------------------------------------|------------------------------------------------------------|
| A0A4D5RRR3       | Tetraspanin                                                 | 6.719                                                      |
| M4PN64           | Cytochrome c oxidase subunit 1 (Fragment)                   | 6.51                                                       |
| B7QKR4           | 25 kDa salivary gland protein C, putative                   | 5.772                                                      |
| A0A4D5SB93       | Putative low-density lipoprotein receptor (Fragment)        | 5.292                                                      |
| A0A4D5RK09       | Putative regulation of transcription (Fragment)             | 5.149                                                      |
| B7Q8I4           | CABIT domain-containing protein                             | 5.056                                                      |
| A0A4D5S4Q9       | Putative salivary secreted protein with polyk tail          | 4.643                                                      |
| Q5S1X6           | Fed tick salivary protein 4                                 | 4.14                                                       |
| B7P3G0           | Chitinase, putative (Fragment)                              | 3.877                                                      |
| B7Q2C1           | Metalloprotease, putative                                   | 3.839                                                      |
| Q8MVB0           | Truncated secreted metalloprotease                          | 3.452                                                      |
| A0A4D5REU5       | Putative pancreatic lipase-like enzyme (Fragment)           | 3.439                                                      |
| B7P1H9           | Neurotrimin, putative (Fragment)                            | 3.217                                                      |
| B7Q0V7           | Secreted protein, putative (Fragment)                       | 3.166                                                      |
| B7PCM5           | Uncharacterized protein                                     | 3.164                                                      |
| F6KSY1           | Salivary protein antigen P8                                 | 3.021                                                      |
| B7PQF4           | Sulfotransferase, putative                                  | 3.006                                                      |
| A0A1S4M4I5       | Salivary gland metalloprotease, putative                    | 2.949                                                      |
| B7PUC0           | AKAP2_C domain-containing protein                           | 2.909                                                      |
| B7PYE3           | Secreted salivary gland peptide, putative (Fragment)        | 2.896                                                      |
| Q95WZ5           | Histamine binding protein                                   | 2.894                                                      |
| B7QFI5           | Cell adhesion molecule, putative                            | 2.795                                                      |
| B7QM92           | Peptidase M12B domain-containing protein                    | 2.787                                                      |
| B7PLN8           | Secreted protein, putative                                  | 2.729                                                      |
| Q8MVB9           | Uncharacterized protein                                     | 2.685                                                      |
| A0A4D5RAJ8       | Putative secreted metalloprotease                           | 2.682                                                      |
| B7Q2B8           | Metalloprotease, putative                                   | 2.666                                                      |
| B7QFF3           | Lipase, putative (Fragment)                                 | 2.645                                                      |
| B7PJA0           | Secreted protein, putative                                  | 2.547                                                      |
| B7PPM4           | Histone-lysine N-methyltransferase, setb1, putative         | 2.47                                                       |
| A0A4D5RG89       | Putative focal adhesion adaptor protein paxillin (Fragment) | 2.469                                                      |
| B7P635           | Sulfotransferase, putative                                  | 2.467                                                      |
| B7PTV6           | FYVE-type domain-containing protein (Fragment)              | 2.456                                                      |
| A0A4D5S5P0       | Uncharacterized protein                                     | 2.406                                                      |
| B7PMM0           | Uncharacterized protein                                     | 2.404                                                      |

|            |                                                                                      |       |
|------------|--------------------------------------------------------------------------------------|-------|
| Q4PMX1     | Putative salivary HBP family member                                                  | 2.404 |
| B7QNS1     | Amino acid transporter                                                               | 2.355 |
| A0A4D5RLP0 | Putative cholesterol transport protein                                               | 2.336 |
| A0A4D5RN87 | Putative serine proteinase inhibitor                                                 | 2.32  |
| A0A4D5RLH3 | Putative pancreatic lipase-like enzyme (Fragment)                                    | 2.244 |
| A0A4D5S4C3 | Uncharacterized protein (Fragment)                                                   | 2.214 |
| B7P1H7     | Titin, putative                                                                      | 2.209 |
| B7Q2X5     | Phosphoinositol 4-phosphate adaptor protein, putative                                | 2.203 |
| Q8MVG3     | Putative secreted protein                                                            | 2.198 |
| A0A4D5RXM4 | Calreticulin                                                                         | 2.183 |
| A0A4D5RM16 | Putative conserved secreted protein (Fragment)                                       | 2.16  |
| Q4PNA3     | Putative secreted protein with basic tail                                            | 2.141 |
| A0A4D5RDR9 | Putative vacuolar assembly/sorting (Fragment)                                        | 2.127 |
| A0A4D5RQI3 | Putative salivary secreted peptide                                                   | 2.113 |
| Q4PML3     | Putative salivary secreted protein                                                   | 2.106 |
| A0A4D5RX10 | Protein disulfide-isomerase                                                          | 2.105 |
| B7PMM4     | ABC transporter, putative (Fragment)                                                 | 2.104 |
| A0A4D5RR07 | Putative conserved secreted protein                                                  | 2.103 |
| B7Q4J7     | Glutathione S-transferase, putative                                                  | 2.097 |
| A0A4D5RGT9 | Putative secreted protein (Fragment)                                                 | 2.066 |
| A0A4D5RQY6 | Putative pdz domain-containing protein (Fragment)                                    | 2.062 |
| A0A4D5RMT9 | Putative cholesterol transport protein                                               | 2.059 |
| B7QK00     | Uncharacterized protein (Fragment)                                                   | 2.047 |
| A0A4D5RT05 | Putative s phase cyclin a-associated protein in the endoplasmic reticulum (Fragment) | 2.045 |
| A0A4D5RZ46 | Putative non-muscle myosin heavy chain ii                                            | 2.035 |
| A0A1S4M122 | Actin, putative                                                                      | 2.03  |
| B7PV21     | Synaptotagmin-14, putative                                                           | 2.003 |
| A0A4D5RJY2 | Putative hemolectin (Fragment)                                                       | 2.002 |
| B7PPE2     | Tnf receptor associated factor, putative (Fragment)                                  | 1.998 |
| B7PTN7     | Prolyl 4-hydroxylase alpha subunit, putative (Fragment)                              | 1.992 |
| B7Q4N7     | Uncharacterized protein                                                              | 1.963 |
| B7PIV2     | Uncharacterized protein                                                              | 1.948 |
| A0A4D5RGQ6 | Putative serine proteinase inhibitor                                                 | 1.945 |
| B7Q1H6     | Laminin gamma-1 chain, putative (Fragment)                                           | 1.942 |
| A0A4D5RQM6 | Putative hyaluronan mediated motility receptor (Fragment)                            | 1.929 |
| B7QCM5     | Ribose-5-phosphate isomerase, putative (Fragment)                                    | 1.923 |
| B7P2U1     | Uncharacterized protein                                                              | 1.917 |
| B7P3N0     | Protein disulfide isomerase 3, putative (Fragment)                                   | 1.902 |
| B7Q713     | Astacin, putative                                                                    | 1.898 |

|            |                                                                                    |       |
|------------|------------------------------------------------------------------------------------|-------|
| B7PMF3     | Secreted protein, putative                                                         | 1.897 |
| A0A4D5RQ02 | Uncharacterized protein (Fragment)                                                 | 1.887 |
| A0A4D5REN9 | Putative guanine nucleotide binding protein mip1                                   | 1.886 |
| B7P1I0     | Titin, putative                                                                    | 1.875 |
| A0A4D5RIY3 | Methionine aminopeptidase (Fragment)                                               | 1.865 |
| A0A4D5RKW6 | Putative l-threonine 3-dehydrogenase mitochondrial-like protein (Fragment)         | 1.861 |
| A0A4D5RGG2 | Putative guanylate-binding protein (Fragment)                                      | 1.851 |
| A0A4D5RRX9 | Putative ml domain protein                                                         | 1.846 |
| B7PL51     | ML domain-containing protein, putative                                             | 1.845 |
| B7QMM1     | Glycine C-acetyltransferase/2-amino-3-ketobutyrate-CoA ligase, putative (Fragment) | 1.832 |
| B7PZH4     | Animal-type fatty acid synthase, putative                                          | 1.831 |
| B7P1I1     | Secreted protein, putative (Fragment)                                              | 1.831 |
| B7P5L3     | Nymphal histamine binding protein B, putative (Fragment)                           | 1.824 |
| A0A4D5RY03 | Putative tick transposon (Fragment)                                                | 1.808 |
| A0A4D5RNY4 | Glucosylceramidase                                                                 | 1.796 |
| B7PS64     | Cytochrome P450, putative (Fragment)                                               | 1.793 |
| B7QKG0     | ACB domain-containing protein                                                      | 1.791 |
| A0A4D5S3C6 | Putative tp53-induced glycolysis and apoptosis regulator b (Fragment)              | 1.783 |
| A0A4D5RGX3 | Putative tick serine proteinase (Fragment)                                         | 1.774 |
| A0A4D5RC42 | Putative elongation factor-1 gamma (Fragment)                                      | 1.772 |
| B7P9L7     | Preprodefensin, putative                                                           | 1.772 |
| B7PAY4     | Zinc phosphodiesterase, putative                                                   | 1.766 |
| A0A4D5RVG6 | Putative sulfotransferase                                                          | 1.765 |
| A0A4D5RFD8 | Putative serine protease                                                           | 1.761 |
| B7PG23     | Serine proteinase inhibitor, putative                                              | 1.758 |
| B7PH23     | Secreted protein, putative                                                         | 1.75  |
| B7QJ79     | Replication factor C, subunit RFC2, putative                                       | 1.749 |
| B7Q032     | Uncharacterized protein                                                            | 1.746 |
| A0A4D5RPH6 | Putative copper-transporting atpase 1                                              | 1.744 |
| B7P101     | Membrane glycoprotein LIG-1, putative                                              | 1.741 |
| A0A4D5S4H2 | Putative acetylcholinesterase/butyrylcholinesterase (Fragment)                     | 1.733 |
| B7PQ22     | Crystal protein, putative                                                          | 1.729 |
| B7Q2B6     | Secreted salivary gland peptide, putative                                          | 1.723 |
| B7Q9D9     | RAB GTPase-activating protein, putative (Fragment)                                 | 1.722 |
| A0A4D5RQD8 | Putative programmed cell death protein (Fragment)                                  | 1.722 |
| A0A4D5RQW5 | Putative membrane glycoprotein lig-1                                               | 1.721 |
| A0A4D5RFZ2 | Putative serine proteinase inhibitor                                               | 1.72  |
| A0A4D5RK10 | Putative membrane glycoprotein lig-1                                               | 1.717 |

|            |                                                                              |       |
|------------|------------------------------------------------------------------------------|-------|
| A0A4D5S320 | Putative nicotinamide n-methyltransferase (Fragment)                         | 1.716 |
| A0A4D5RG78 | Putative adp-ribosylglycohydrolase posttranslational modification (Fragment) | 1.71  |
| A0A4D5RFM0 | Putative serine protease (Fragment)                                          | 1.708 |
| B7P1J7     | Uncharacterized protein                                                      | 1.697 |
| A0A4D5S7Q5 | Putative cystatin iscys1                                                     | 1.696 |
| A0A4D5RRJ5 | Glutathione peroxidase (Fragment)                                            | 1.69  |
| A0A4D5S4S9 | Uncharacterized protein (Fragment)                                           | 1.686 |
| B7QGM6     | Phospholipase A2 precursor, putative                                         | 1.686 |
| A0A4D5RLH7 | Putative 4-hydroxyphenylpyruvate dioxygenase (Fragment)                      | 1.682 |
| A0A1S6Y024 | Reeler domain-containing gut protein                                         | 1.68  |
| B7P3D1     | Tpr and ank domain-containing protein, putative                              | 1.679 |
| B7P102     | Membrane glycoprotein lig1, putative                                         | 1.671 |
| A0A4D5S597 | Putative n6-adenine-specific dna methyltransferase (Fragment)                | 1.668 |
| A0A4D5RHN9 | Putative fanconi anemia group i protein                                      | 1.665 |
| A0A4D5RMD2 | Putative conserved secreted protein                                          | 1.663 |
| B7PA38     | Peptidyl-prolyl cis-trans isomerase E                                        | 1.662 |
| B7PUF8     | Adenylate cyclase, putative (Fragment)                                       | 1.661 |
| A0A4D5RNU3 | BTB domain-containing protein (Fragment)                                     | 1.657 |
| B7Q013     | L-allo-threonine aldolase, putative                                          | 1.657 |
| A0A4D5S5Z5 | Putative conserved secreted protein                                          | 1.653 |
| A0A4D5RXW7 | Putative ezrin/radixin/moesin family (Fragment)                              | 1.648 |
| B7P2I1     | Oxysterol-binding protein (Fragment)                                         | 1.647 |
| A0A4D5S337 | Putative antimicrobial peptide                                               | 1.646 |
| A0A4D5REA9 | Glucose-6-phosphate isomerase                                                | 1.641 |
| B7PSK7     | Alanine-glyoxylate aminotransferase, putative                                | 1.625 |
| B7Q9Y6     | Rif1_N domain-containing protein                                             | 1.618 |
| A0A4D5RJD5 | Putative notch signaling protein (Fragment)                                  | 1.611 |
| A0A4D5S4X0 | Putative epithelin/granulin (Fragment)                                       | 1.611 |
| A0A4D5RKR3 | Putative cytochrome (Fragment)                                               | 1.611 |
| A0A4D5RHM2 | Putative positive regulation of cytokine secretion (Fragment)                | 1.61  |
| A0A4D5S093 | Putative vegetative cell wall protein gp1 (Fragment)                         | 1.606 |
| A0A4D5RVD6 | Putative lipoprotein amino terminal region                                   | 1.603 |
| B7QL39     | Translation elongation factor G, putative (Fragment)                         | 1.601 |
| A0A4D5S7C6 | Putative antimicrobial peptide                                               | 1.597 |
| A0A4D5RST4 | Carboxylic ester hydrolase (Fragment)                                        | 1.596 |
| A0A4D5RTN0 | Putative membrane protein                                                    | 1.595 |
| B7PW73     | Transcription initiation factor TFIID subunit 10                             | 1.592 |
| A0A4D5RPJ9 | Uncharacterized protein (Fragment)                                           | 1.591 |
| A0A4D5RZZ4 | Putative enteropeptidase isoform x2                                          | 1.582 |

|             |                                                                                                         |       |
|-------------|---------------------------------------------------------------------------------------------------------|-------|
| B7P7W6      | Innexin                                                                                                 | 1.573 |
| A0A4D5S634  | Uncharacterized protein (Fragment)                                                                      | 1.569 |
| A0A4D5RB00  | Putative macrophage migration inhibitory factor (Fragment)                                              | 1.566 |
| A0A4D5S624  | Putative serine proteinase (Fragment)                                                                   | 1.565 |
| A0A4D5RL41  | Putative sodium-bile acid cotransporter                                                                 | 1.564 |
| A0A4D5SB43  | Putative cathepsin b endopeptidase                                                                      | 1.564 |
| B7PLF9      | Kinesin-associated protein, putative                                                                    | 1.561 |
| B7PR02      | Peptidase_M28 domain-containing protein                                                                 | 1.56  |
| B7PYL3      | Dehydrogenase, putative                                                                                 | 1.557 |
| A0A4D5RS25  | Putative rna polymerase-associated protein ctr9 (Fragment)                                              | 1.555 |
| B7PK57      | Uncharacterized protein                                                                                 | 1.554 |
| B7PBF8      | ADP ribosylation factor 79F, putative (Fragment)                                                        | 1.55  |
| A0A4D5RLI9  | Putative p450 (Fragment)                                                                                | 1.55  |
| B7QNH1      | Triacylglycerol lipase, putative (Fragment)                                                             | 1.549 |
| A0A4D5RFT9  | Putative elongation factor 2 (Fragment)                                                                 | 1.547 |
| B7P8V8      | Uncharacterized protein                                                                                 | 1.546 |
| A0A4D5RFC8  | Putative histone acetyltransferase saga trrap/tra1 component pi-3 kinase superfamily protein (Fragment) | 1.545 |
| B7Q4V8      | Uncharacterized protein                                                                                 | 1.543 |
| B7PGR7      | Uncharacterized protein                                                                                 | 1.542 |
| B7Q0L0      | Uncharacterized protein                                                                                 | 1.542 |
| B7QKR7      | Secreted protein, putative                                                                              | 1.54  |
| B7P8S8      | Gar2, putative                                                                                          | 1.537 |
| B7PHX3      | Chymotrypsin-C precursor, putative                                                                      | 1.536 |
| A0A4D5RRL1  | Putative asparaginyl peptidase (Fragment)                                                               | 1.535 |
| A0A4D5RUJ6  | Putative secreted protein (Fragment)                                                                    | 1.535 |
| A0A4D5RQF0  | Putative aquaporin (Fragment)                                                                           | 1.532 |
| B7PR40      | SCP domain-containing protein                                                                           | 1.528 |
| A0A4D5RG65  | Putative membrane glycoprotein lig-1                                                                    | 1.527 |
| B7QIK8      | Chitinase, putative                                                                                     | 1.525 |
| A0A4D5RUK8  | Putative snf2 family dna-dependent atpase (Fragment)                                                    | 1.524 |
| A0A4D5RYS5  | Putative peritrophic membrane chitin binding protein (Fragment)                                         | 1.521 |
| A0A4D5RJV0  | Putative transcription factor (Fragment)                                                                | 1.52  |
| A0A4D5R JW4 | Putative phd finger protein (Fragment)                                                                  | 1.519 |
| B7PXA4      | Ves G 1 allergen precursor, putative (Fragment)                                                         | 1.518 |
| A0A4D5RIG3  | Putative cytochrome                                                                                     | 1.518 |
| A0A4D5S0E2  | Phospholipase B-like (Fragment)                                                                         | 1.51  |
| B7P370      | Ferrochelataase                                                                                         | 1.51  |
| A0A4D5SAY3  | Putative fatty acid synthase (Fragment)                                                                 | 1.51  |

|            |                                                                                     |       |
|------------|-------------------------------------------------------------------------------------|-------|
| B7QI18     | RAB GDP/GTP exchange factor, putative                                               | 1.503 |
| A0A4D5RWD4 | Putative tir domain protein (Fragment)                                              | 1.502 |
| B7Q911     | tRNA pseudouridine synthase                                                         | 1.499 |
| B7Q0I5     | Proteasome, subunit beta, putative                                                  | 0.665 |
| B7QL12     | Glycyl-tRNA synthetase, putative                                                    | 0.663 |
| A0A4D5RU61 | Putative hydroxysteroid 17-beta dehydrogenase 11 (Fragment)                         | 0.656 |
| B7P5P9     | Cuticle protein, putative                                                           | 0.647 |
| A0A4D5RPD2 | Dolichyl-diphosphooligosaccharide--protein glycosyltransferase subunit 2 (Fragment) | 0.638 |
| B7PB63     | Leucine-rich transmembrane protein, putative                                        | 0.624 |
| A0A4D5RUL4 | Putative serine proteinase inhibitor                                                | 0.606 |
| B7PPR2     | Cytochrome P450, putative                                                           | 0.588 |
| A0A4D5RLE2 | Putative fructose-16-bisphosphatase (Fragment)                                      | 0.567 |
| B7P6X9     | Hemolectin, putative (Fragment)                                                     | 0.559 |
| B7PQQ9     | Selenium-binding protein, putative (Fragment)                                       | 0.541 |
| A0A4D5RPX9 | Putative o-methyltransferase (Fragment)                                             | 0.524 |
| A0A4D5RVM4 | Putative multiple coagulation factor deficiency 2-like protein (Fragment)           | 0.43  |
| A0A1S4KT52 | WD-repeat protein, putative                                                         | 0.351 |
| A0A4D5RS70 | Putative sulfotransferase (Fragment)                                                | 0.351 |

**Table S3: Differentially produced proteins between *B. burgdorferi*-infected *Dome1*-knockdown and *B. burgdorferi*-infected control (ds*GFP*-injected) ticks**

| Accession number | Description                                                                          | Abundance Ratio (%): (Infected ds <i>Dome1</i> ) / (Infected ds <i>GFP</i> ) |
|------------------|--------------------------------------------------------------------------------------|------------------------------------------------------------------------------|
| A0A4D5SB93       | Putative low-density lipoprotein receptor (Fragment)                                 | 2.192                                                                        |
| B7Q6J1           | GGY domain-containing protein, putative (Fragment)                                   | 1.809                                                                        |
| A0A4D5RK09       | Putative regulation of transcription (Fragment)                                      | 1.799                                                                        |
| A0A4D5RG89       | Putative focal adhesion adaptor protein paxillin (Fragment)                          | 1.782                                                                        |
| A0A4D5S4S9       | Uncharacterized protein (Fragment)                                                   | 1.767                                                                        |
| M4PN64           | Cytochrome c oxidase subunit 1 (Fragment)                                            | 1.754                                                                        |
| A0A4D5RT05       | Putative s phase cyclin a-associated protein in the endoplasmic reticulum (Fragment) | 1.642                                                                        |
| B7PPM4           | Histone-lysine N-methyltransferase, setb1, putative                                  | 1.608                                                                        |
| B7Q032           | Uncharacterized protein                                                              | 1.583                                                                        |
| A0A4D5RJ63       | Putative muscle m-line assembly protein unc-89                                       | 1.583                                                                        |
| B7Q8I4           | CABIT domain-containing protein                                                      | 1.543                                                                        |
| A0A4D5RSN5       | Uncharacterized protein (Fragment)                                                   | 1.514                                                                        |
| A0A4D5RRR3       | Tetraspanin                                                                          | 1.508                                                                        |
| A0A4D5RYS5       | Putative peritrophic membrane chitin binding protein (Fragment)                      | 1.506                                                                        |
| B7Q2X5           | Phosphoinositol 4-phosphate adaptor protein, putative                                | 1.503                                                                        |
| B7PPE2           | Tnf receptor associated factor, putative (Fragment)                                  | 1.498                                                                        |
| A0A4D5RIC5       | Putative zinc carboxypeptidase (Fragment)                                            | 0.664                                                                        |
| A0A4D5RLP0       | Putative cholesterol transport protein                                               | 0.662                                                                        |
| A0A4D5RRJ5       | Glutathione peroxidase (Fragment)                                                    | 0.661                                                                        |
| B7QKS2           | Ig-like domain-containing protein                                                    | 0.659                                                                        |
| B7PQX5           | Secreted protein, putative                                                           | 0.658                                                                        |
| B7Q725           | Fatty acid synthase, putative                                                        | 0.656                                                                        |
| A0A4D5RHR2       | Putative salivary gland secreted protein (Fragment)                                  | 0.655                                                                        |
| B7PTA2           | Cation-transporting ATPase 13a1, putative                                            | 0.649                                                                        |
| A0A4D5RHF7       | Putative gamma-butyrobetaine2-oxoglutarate dioxygenase (Fragment)                    | 0.649                                                                        |
| A0A4D5RSQ0       | EF-hand domain-containing protein                                                    | 0.649                                                                        |

|            |                                                                   |       |
|------------|-------------------------------------------------------------------|-------|
| B7PQQ9     | Selenium-binding protein, putative (Fragment)                     | 0.646 |
| B7PLT0     | Secreted protein, putative                                        | 0.645 |
| B7P5L3     | Nymphal histamine binding protein B, putative (Fragment)          | 0.641 |
| B7PSV2     | Methyltransf_11 domain-containing protein                         | 0.638 |
| B7PB63     | Leucine-rich transmembrane protein, putative                      | 0.635 |
| B7QA81     | Cytochrome P450, putative (Fragment)                              | 0.627 |
| A0A4D5RQM6 | Putative hyaluronan mediated motility receptor (Fragment)         | 0.625 |
| A0A4D5S320 | Putative nicotinamide n-methyltransferase (Fragment)              | 0.621 |
| A0A4D5RFS7 | Putative dehydrogenase (Fragment)                                 | 0.621 |
| A0A4D5RWS9 | Putative secreted protein (Fragment)                              | 0.612 |
| B7Q2V4     | Glycine N-methyltransferase, putative                             | 0.605 |
| B7PJA0     | Secreted protein, putative                                        | 0.604 |
| A0A4D5RMJ7 | Putative tick serine proteinase (Fragment)                        | 0.602 |
| Q8MVB9     | Uncharacterized protein                                           | 0.601 |
| A0A4D5RLW3 | Putative secreted protein                                         | 0.599 |
| B7QC78     | Uncharacterized protein                                           | 0.594 |
| A0A4D5RUS6 | Putative sulfotransferase                                         | 0.591 |
| A0A4D5RNM8 | Putative gamma-butyrobetaine2-oxoglutarate dioxygenase (Fragment) | 0.588 |
| A0A4D5RT56 | Putative serine proteinase inhibitor serpin-3 (Fragment)          | 0.569 |
| B7QF31     | Caspase, apoptotic cysteine protease, putative (Fragment)         | 0.56  |
| B7PFB3     | N-methyltransferase, putative (Fragment)                          | 0.554 |
| B7QNY6     | Serine proteinase inhibitor serpin-3, putative                    | 0.55  |
| A0A4D5RQP0 | Putative conserved secreted protein (Fragment)                    | 0.535 |
| B7QJY6     | Sulfotransferase, putative                                        | 0.508 |
| B7PQX7     | Uncharacterized protein                                           | 0.479 |
| A0A4D5RS70 | Putative sulfotransferase (Fragment)                              | 0.479 |
| A0A4D5RPX9 | Putative o-methyltransferase (Fragment)                           | 0.468 |
| A0A4D5SAY3 | Putative fatty acid synthase (Fragment)                           | 0.458 |
| B7P3V7     | Uncharacterized protein                                           | 0.446 |
| A0A4D5RUL4 | Putative serine proteinase inhibitor                              | 0.395 |



**Table S4: Differentially produced proteins between *B. burgdorferi*-infected *Dome1*-knockdown and naïve *Dome1*-knockdown ticks**

| Accession number | Description                                                               | Abundance Ratio (%): (Infected ds <i>Dome1</i> ) / (Naïve ds <i>Dome1</i> ) |
|------------------|---------------------------------------------------------------------------|-----------------------------------------------------------------------------|
| A0A4D5RHI9       | Putative epithelial chloride channel protein                              | 2.108                                                                       |
| B7QH07           | Cytoplasmic dynein heavy chain, putative                                  | 1.969                                                                       |
| B7QHR8           | Zinc/iron transporter, putative                                           | 1.961                                                                       |
| A0A4D5RVM4       | Putative multiple coagulation factor deficiency 2-like protein (Fragment) | 1.856                                                                       |
| A0A4D5S3U1       | Putative molecular chaperone distantly (Fragment)                         | 1.806                                                                       |
| A0A4D5RP87       | Uncharacterized protein (Fragment)                                        | 1.738                                                                       |
| B7Q489           | Salivary sulfotransferase, putative                                       | 1.734                                                                       |
| B7QNV8           | Uncharacterized protein                                                   | 1.732                                                                       |
| B7Q2J6           | Bis(5'-adenosyl)-triphosphatase                                           | 1.643                                                                       |
| A0A1S4KT52       | WD-repeat protein, putative                                               | 1.626                                                                       |
| B7QLX7           | Uncharacterized protein                                                   | 1.626                                                                       |
| A0A4D5RWJ3       | Uncharacterized protein                                                   | 1.618                                                                       |
| A0A4D5RBQ9       | Ig-like domain-containing protein                                         | 1.617                                                                       |
| A0A4D5S513       | Putative tumor necrosis factor- $\alpha$ -converting enzyme tace/adam17   | 1.584                                                                       |
| A0A4D5RS29       | Putative atp-dependent rna helicase (Fragment)                            | 1.578                                                                       |
| A0A4D5RRR3       | Tetraspanin                                                               | 1.565                                                                       |
| A0A4D5RU19       | Putative nucleolar and coiled-body phosphoprotein 1 (Fragment)            | 1.558                                                                       |
| B7QM70           | Small heat shock protein, putative (Fragment)                             | 1.554                                                                       |
| M4PN64           | Cytochrome c oxidase subunit 1 (Fragment)                                 | 1.546                                                                       |
| B7Q0I5           | Proteasome, subunit beta, putative                                        | 1.539                                                                       |
| B7PQ21           | DEAD box ATP-dependent RNA helicase, putative (Fragment)                  | 1.531                                                                       |
| A0A4D5RNR7       | Putative cytochrome                                                       | 1.513                                                                       |
| B7QL34           | Secreted salivary gland peptide, putative                                 | 0.669                                                                       |
| A0A088CQT2       | Cytochrome c oxidase subunit 1 (Fragment)                                 | 0.668                                                                       |
| A0A4D5RPP1       | Putative cytotoxin (Fragment)                                             | 0.666                                                                       |
| B7Q2V4           | Glycine N-methyltransferase, putative                                     | 0.666                                                                       |
| A0A4D5RRJ4       | Putative lysosomal trafficking regulator                                  | 0.664                                                                       |
| A0A4D5RBB9       | Putative chitinase                                                        | 0.662                                                                       |
| A0A4D5RP33       | Putative peritrophic membrane chitin binding protein                      | 0.658                                                                       |

|            |                                                                             |       |
|------------|-----------------------------------------------------------------------------|-------|
| B7PXA4     | Ves G 1 allergen precursor, putative (Fragment)                             | 0.658 |
| B7PN67     | Secreted protein, putative                                                  | 0.657 |
| Q95WZ0     | 25 kDa salivary gland protein B                                             | 0.656 |
| B7PKZ0     | Secreted cystatin, putative                                                 | 0.656 |
| A0A4D5RS25 | Putative rna polymerase-associated protein ctr9 (Fragment)                  | 0.654 |
| A0A4D5S7Q5 | Putative cystatin iscys1                                                    | 0.654 |
| B7PQ15     | Niemann-Pick type C1 domain-containing protein, putative                    | 0.653 |
| B7PBU8     | Apoptosis-promoting RNA-binding protein TIA-1/TIAR, putative                | 0.653 |
| B7Q2W4     | RAS-related protein, putative (Fragment)                                    | 0.647 |
| A0A4D5RGQ6 | Putative serine proteinase inhibitor                                        | 0.645 |
| A0A4D5RM39 | Putative alpha-macroglobulin                                                | 0.644 |
| A0A4D5RTY6 | Putative rna polymerase ii c-terminal domain-binding protein ra4 (Fragment) | 0.641 |
| A0A4D5RG93 | Putative trypsin-like serine protease                                       | 0.64  |
| B7PIB2     | DNA-directed RNA polymerase III subunit RPC5, putative                      | 0.639 |
| A0A4D5RKE2 | Putative cytochrome (Fragment)                                              | 0.639 |
| A0A4D5RNJ6 | Putative serine protease                                                    | 0.639 |
| A0A4D5RLW3 | Putative secreted protein                                                   | 0.639 |
| A0A4D5RJW4 | Putative phd finger protein (Fragment)                                      | 0.637 |
| B7QP27     | Peptidase, putative                                                         | 0.637 |
| A0A4D5RVL2 | Putative secreted protein (Fragment)                                        | 0.637 |
| A0A4D5RFM0 | Putative serine protease (Fragment)                                         | 0.636 |
| B7PIV2     | Uncharacterized protein                                                     | 0.634 |
| B7PKG2     | Fasciclin domain-containing protein, putative                               | 0.634 |
| B7Q911     | tRNA pseudouridine synthase                                                 | 0.633 |
| B7PW73     | Transcription initiation factor TFIID subunit 10                            | 0.632 |
| B7QKR7     | Secreted protein, putative                                                  | 0.632 |
| B7P7W6     | Innexin                                                                     | 0.631 |
| B7QNH1     | Triacylglycerol lipase, putative (Fragment)                                 | 0.629 |
| B7Q8R2     | Pyrroline-5-carboxylate reductase 1                                         | 0.629 |
| Q5ISE3     | Scapularisin preproprotein                                                  | 0.628 |
| A0A4D5RLH7 | Putative 4-hydroxyphenylpyruvate dioxygenase (Fragment)                     | 0.625 |
| A0A4D5RKR3 | Putative cytochrome (Fragment)                                              | 0.625 |
| B7QDU9     | DUF3421 domain-containing protein                                           | 0.624 |
| A0A4D5RG89 | Putative focal adhesion adaptor protein paxillin (Fragment)                 | 0.62  |
| A0A4D5SB53 | Putative conserved secreted protein                                         | 0.619 |

|            |                                                                                    |       |
|------------|------------------------------------------------------------------------------------|-------|
| A0A4D5S4Y8 | Phospholipase B-like (Fragment)                                                    | 0.618 |
| B7P5K8     | Branched-chain amino acid aminotransferase, putative                               | 0.618 |
| B7QIK8     | Chitinase, putative                                                                | 0.618 |
| A0A4D5RFD8 | Putative serine protease                                                           | 0.616 |
| B7Q1Z5     | Uncharacterized protein                                                            | 0.615 |
| A0A4D5RJJ4 | Putative sulfotransferase                                                          | 0.612 |
| A0A4D5S6D9 | Putative paramyosin (Fragment)                                                     | 0.612 |
| B7Q4V8     | Uncharacterized protein                                                            | 0.612 |
| A0A4D5S3C6 | Putative tp53-induced glycolysis and apoptosis regulator b (Fragment)              | 0.611 |
| B7QMM1     | Glycine C-acetyltransferase/2-amino-3-ketobutyrate-CoA ligase, putative (Fragment) | 0.61  |
| B7PLJ7     | Apoptosis inducing factor, putative                                                | 0.61  |
| A0A4D5RFD3 | Putative serine proteinase 2                                                       | 0.609 |
| B7PA38     | Peptidyl-prolyl cis-trans isomerase E                                              | 0.609 |
| B7P370     | Ferrochelatase                                                                     | 0.607 |
| B7PPW4     | PRA1 family protein                                                                | 0.607 |
| A0A4D5RJV0 | Putative transcription factor (Fragment)                                           | 0.607 |
| A0A4D5S1S8 | Putative paramyosin (Fragment)                                                     | 0.606 |
| A0A4D5RPJ8 | Putative serine proteinase                                                         | 0.606 |
| B7PH24     | Serine protease inhibitor, putative                                                | 0.606 |
| B7PN60     | Esterase, putative (Fragment)                                                      | 0.606 |
| A0A4D5RG65 | Putative membrane glycoprotein lig-1                                               | 0.605 |
| A0A4D5RL78 | Putative 15-hydroxyprostaglandin dehydrogenase (Fragment)                          | 0.604 |
| B7PNJ5     | Serine proteinase inhibitor, putative                                              | 0.602 |
| A0A4D5RG19 | Putative ml domain protein                                                         | 0.601 |
| A0A4D5RKG9 | Putative abl interactor abi-1 (Fragment)                                           | 0.599 |
| B7Q2X5     | Phosphoinositol 4-phosphate adaptor protein, putative                              | 0.597 |
| B7Q135     | Secreted protein, putative                                                         | 0.596 |
| A0A4D5RRT2 | Putative mitochondrial/plastidial beta-ketoacyl-acp reductase (Fragment)           | 0.596 |
| B7PV75     | Glutathione peroxidase                                                             | 0.595 |
| B7PLF9     | Kinesin-associated protein, putative                                               | 0.594 |
| B7QL39     | Translation elongation factor G, putative (Fragment)                               | 0.593 |
| B7Q9Y6     | Rif1_N domain-containing protein                                                   | 0.593 |
| B7QIW2     | Secreted salivary gland peptide, putative                                          | 0.593 |
| A0A4D5RKW6 | Putative l-threonine 3-dehydrogenase mitochondrial-like protein (Fragment)         | 0.592 |

|            |                                                                |       |
|------------|----------------------------------------------------------------|-------|
| A0A4D5S2K3 | Putative single domain von willebrand factor type c (Fragment) | 0.592 |
| B7QF31     | Caspase, apoptotic cysteine protease, putative (Fragment)      | 0.592 |
| A0A4D5RUP4 | Putative gastric triacylglycerol lipase                        | 0.589 |
| B7PY78     | DNA-repair protein xrcc1, putative (Fragment)                  | 0.589 |
| B7PZH4     | Animal-type fatty acid synthase, putative                      | 0.585 |
| B7PFI1     | Molybdenum cofactor biosynthesis pathway protein, putative     | 0.585 |
| A0A4D5RQW5 | Putative membrane glycoprotein lig-1                           | 0.584 |
| B7P102     | Membrane glycoprotein lig1, putative                           | 0.584 |
| A0A4D5REU5 | Putative pancreatic lipase-like enzyme (Fragment)              | 0.583 |
| B7PCM5     | Uncharacterized protein                                        | 0.582 |
| B7PYG8     | Secreted salivary gland peptide, putative                      | 0.582 |
| A0A4D5S4X0 | Putative epithelin/granulin (Fragment)                         | 0.58  |
| A0A4D5RK10 | Putative membrane glycoprotein lig-1                           | 0.579 |
| A0A4D5RWS9 | Putative secreted protein (Fragment)                           | 0.578 |
| B7PQX7     | Uncharacterized protein                                        | 0.577 |
| B7PMF3     | Secreted protein, putative                                     | 0.575 |
| B7PTS6     | AAA domain-containing protein                                  | 0.574 |
| B7PSK7     | Alanine-glyoxylate aminotransferase, putative                  | 0.573 |
| A0A4D5S4H2 | Putative acetylcholinesterase/butrylcholinesterase (Fragment)  | 0.573 |
| A0A4D5S320 | Putative nicotinamide n-methyltransferase (Fragment)           | 0.573 |
| B7PS56     | Secreted salivary gland peptide, putative                      | 0.571 |
| B7Q2Y8     | Secreted salivary gland peptide, putative                      | 0.571 |
| B7QKG0     | ACB domain-containing protein                                  | 0.57  |
| A0A4D5RZ46 | Putative non-muscle myosin heavy chain ii                      | 0.568 |
| A0A4D5RTN0 | Putative membrane protein                                      | 0.568 |
| B7QC78     | Uncharacterized protein                                        | 0.568 |
| B7P7L1     | Uncharacterized protein                                        | 0.567 |
| B7QCM5     | Ribose-5-phosphate isomerase, putative (Fragment)              | 0.565 |
| B7PG23     | Serine proteinase inhibitor, putative                          | 0.564 |
| B7PS64     | Cytochrome P450, putative (Fragment)                           | 0.562 |
| B7PBF8     | ADP ribosylation factor 79F, putative (Fragment)               | 0.559 |
| B7PQ22     | Crystal protein, putative                                      | 0.559 |

|            |                                                                                                         |       |
|------------|---------------------------------------------------------------------------------------------------------|-------|
| A0A4D5RT56 | Putative serine proteinase inhibitor serpin-3 (Fragment)                                                | 0.559 |
| A0A4D5RTF2 | Uncharacterized protein (Fragment)                                                                      | 0.558 |
| B7P2U1     | Uncharacterized protein                                                                                 | 0.556 |
| A0A4D5RLC8 | Putative catalytic domain of phosphatidylinositol-specific phospholipase c x domain protein             | 0.556 |
| A0A4D5RJD5 | Putative notch signaling protein (Fragment)                                                             | 0.554 |
| A0A4D5RPH6 | Putative copper-transporting atpase 1                                                                   | 0.554 |
| A0A4D5S005 | Putative chitinase (Fragment)                                                                           | 0.554 |
| A0A4D5REA9 | Glucose-6-phosphate isomerase                                                                           | 0.553 |
| A0A4D5S423 | Putative paramyosin                                                                                     | 0.55  |
| A0A1S6Y024 | Reeler domain-containing gut protein                                                                    | 0.549 |
| A0A4D5S5P0 | Uncharacterized protein                                                                                 | 0.546 |
| A0A4D5RFC8 | Putative histone acetyltransferase saga trrap/tra1 component pi-3 kinase superfamily protein (Fragment) | 0.545 |
| B7PLN8     | Secreted protein, putative                                                                              | 0.54  |
| A0A4D5RNY4 | Glucosylceramidase                                                                                      | 0.54  |
| A0A4D5S337 | Putative antimicrobial peptide                                                                          | 0.539 |
| B7PTN7     | Prolyl 4-hydroxylase alpha subunit, putative (Fragment)                                                 | 0.539 |
| A0A4D5RPD4 | Putative zinc carboxypeptidase (Fragment)                                                               | 0.538 |
| A0A4D5RGX3 | Putative tick serine proteinase (Fragment)                                                              | 0.537 |
| A0A4D5RFE7 | Tubulin gamma chain (Fragment)                                                                          | 0.533 |
| B7PHX3     | Chymotrypsin-C precursor, putative                                                                      | 0.533 |
| B7PUZ3     | Loss of heterozygosity 12 chromosomal region 1 protein, putative                                        | 0.533 |
| B7QGM6     | Phospholipase A2 precursor, putative                                                                    | 0.53  |
| B7PAY4     | Zinc phosphodiesterase, putative                                                                        | 0.53  |
| B7PLT0     | Secreted protein, putative                                                                              | 0.529 |
| A0A4D5S624 | Putative serine proteinase (Fragment)                                                                   | 0.528 |
| B7P635     | Sulfotransferase, putative                                                                              | 0.527 |
| A0A4D5RVG6 | Putative sulfotransferase                                                                               | 0.525 |
| A0A4D5RRW2 | Putative transporter (Fragment)                                                                         | 0.525 |
| A0A4D5RUS6 | Putative sulfotransferase                                                                               | 0.524 |
| B7Q0W8     | 39S ribosomal protein L21, putative                                                                     | 0.523 |
| B7PV21     | Synaptotagmin-14, putative                                                                              | 0.522 |
| B7Q118     | RAB GDP/GTP exchange factor, putative                                                                   | 0.52  |
| B7PUS3     | Peroxisomal phytanoyl-CoA hydroxylase, putative                                                         | 0.518 |
| B7PR40     | SCP domain-containing protein                                                                           | 0.515 |
| B7Q725     | Fatty acid synthase, putative                                                                           | 0.515 |

|            |                                                                                        |       |
|------------|----------------------------------------------------------------------------------------|-------|
| B7PJW5     | Peritrophic membrane chitin binding protein, putative                                  | 0.514 |
| A0A4D5RX10 | Protein disulfide-isomerase                                                            | 0.511 |
| A0A4D5RQM6 | Putative hyaluronan mediated motility receptor (Fragment)                              | 0.511 |
| B7P8V8     | Uncharacterized protein                                                                | 0.509 |
| B7P101     | Membrane glycoprotein LIG-1, putative                                                  | 0.504 |
| A0A1S4M122 | Actin, putative                                                                        | 0.502 |
| A0A4D5RJY2 | Putative hemolectin (Fragment)                                                         | 0.499 |
| B7PTA2     | Cation-transporting ATPase 13a1, putative                                              | 0.496 |
| A0A4D5RDR9 | Putative vacuolar assembly/sorting (Fragment)                                          | 0.494 |
| A0A4D5RQI3 | Putative salivary secreted peptide                                                     | 0.49  |
| B7Q713     | Astacin, putative                                                                      | 0.49  |
| A0A4D5RIY3 | Methionine aminopeptidase (Fragment)                                                   | 0.488 |
| B7PH23     | Secreted protein, putative                                                             | 0.486 |
| B7QKR4     | 25 kDa salivary gland protein C, putative                                              | 0.483 |
| B7QKS2     | Ig-like domain-containing protein                                                      | 0.483 |
| B7PJA0     | Secreted protein, putative                                                             | 0.483 |
| A0A4D5RLH3 | Putative pancreatic lipase-like enzyme (Fragment)                                      | 0.476 |
| A0A4D5RXM4 | Calreticulin                                                                           | 0.476 |
| B7P6U4     | Salivary secreted cytotoxin, putative                                                  | 0.476 |
| B7Q1H6     | Laminin gamma-1 chain, putative (Fragment)                                             | 0.475 |
| A0A4D5RK09 | Putative regulation of transcription (Fragment)                                        | 0.473 |
| A0A4D5RMT9 | Putative cholesterol transport protein                                                 | 0.473 |
| A0A4D5RFS7 | Putative dehydrogenase (Fragment)                                                      | 0.473 |
| A0A4D5S7C6 | Putative antimicrobial peptide                                                         | 0.472 |
| B7QJY6     | Sulfotransferase, putative                                                             | 0.471 |
| B7PL51     | ML domain-containing protein, putative                                                 | 0.47  |
| B7P110     | Titin, putative                                                                        | 0.464 |
| B7P5L3     | Nymphal histamine binding protein B, putative (Fragment)                               | 0.458 |
| B7QK00     | Uncharacterized protein (Fragment)                                                     | 0.455 |
| A0A4D5RD42 | Putative eukaryotic translation initiation factor 4 gamma 1-like isoform x2 (Fragment) | 0.449 |
| B7PTV6     | FYVE-type domain-containing protein (Fragment)                                         | 0.447 |
| B7PMM4     | ABC transporter, putative (Fragment)                                                   | 0.447 |
| A0A4D5RN87 | Putative serine proteinase inhibitor                                                   | 0.443 |
| A0A4D5RQN5 | Putative secreted protein (Fragment)                                                   | 0.438 |
| A0A4D5RR07 | Putative conserved secreted protein                                                    | 0.435 |

|            |                                                                                     |       |
|------------|-------------------------------------------------------------------------------------|-------|
| B7P111     | Secreted protein, putative (Fragment)                                               | 0.435 |
| B7PMM0     | Uncharacterized protein                                                             | 0.424 |
| B7PS13     | ING (mammalian INhibitor of Growth) family protein (ing3)-like, putative (Fragment) | 0.423 |
| A0A4D5RRJ5 | Glutathione peroxidase (Fragment)                                                   | 0.417 |
| B7QJ79     | Replication factor C, subunit RFC2, putative                                        | 0.414 |
| Q8MVG3     | Putative secreted protein                                                           | 0.414 |
| A0A4D5S4C3 | Uncharacterized protein (Fragment)                                                  | 0.413 |
| B7PQF4     | Sulfotransferase, putative                                                          | 0.412 |
| B7P9L7     | Preprodefensin, putative                                                            | 0.404 |
| Q4PML3     | Putative salivary secreted protein                                                  | 0.403 |
| A0A4D5RIC5 | Putative zinc carboxypeptidase (Fragment)                                           | 0.388 |
| Q95WZ5     | Histamine binding protein                                                           | 0.386 |
| B7P1H7     | Titin, putative                                                                     | 0.381 |
| B7Q4J7     | Glutathione S-transferase, putative                                                 | 0.378 |
| A0A4D5RLP0 | Putative cholesterol transport protein                                              | 0.375 |
| A0A4D5RRX9 | Putative ml domain protein                                                          | 0.37  |
| B7Q2B8     | Metalloprotease, putative                                                           | 0.369 |
| B7PUC0     | AKAP2_C domain-containing protein                                                   | 0.36  |
| B7QNS1     | Amino acid transporter                                                              | 0.358 |
| A0A4D5SAY3 | Putative fatty acid synthase (Fragment)                                             | 0.341 |
| B7PJW6     | Chitin deacetylase 9, putative                                                      | 0.333 |
| Q4PNA3     | Putative secreted protein with basic tail                                           | 0.33  |
| Q4PMX1     | Putative salivary HBP family member                                                 | 0.323 |
| B7Q8I4     | CABIT domain-containing protein                                                     | 0.321 |
| B7QM92     | Peptidase M12B domain-containing protein                                            | 0.318 |
| F6KSY1     | Salivary protein antigen P8                                                         | 0.315 |
| B7QFF3     | Lipase, putative (Fragment)                                                         | 0.297 |
| A0A1S4M4I5 | Salivary gland metalloprotease, putative                                            | 0.296 |
| B7Q0V7     | Secreted protein, putative (Fragment)                                               | 0.29  |
| A0A4D5RU61 | Putative hydroxysteroid 17-beta dehydrogenase 11 (Fragment)                         | 0.287 |
| Q8MVB9     | Uncharacterized protein                                                             | 0.276 |
| B7P1H9     | Neurotrimin, putative (Fragment)                                                    | 0.268 |
| Q5S1X6     | Fed tick salivary protein 4                                                         | 0.266 |
| B7QFI5     | Cell adhesion molecule, putative                                                    | 0.258 |
| B7P3G0     | Chitinase, putative (Fragment)                                                      | 0.256 |
| B7PYE3     | Secreted salivary gland peptide, putative (Fragment)                                | 0.242 |
| B7Q2C1     | Metalloprotease, putative                                                           | 0.237 |
| A0A4D5S4Q9 | Putative salivary protein with polyk tail                                           | 0.237 |
| A0A4D5RAJ8 | Putative secreted metalloprotease                                                   | 0.221 |
| Q8MVB0     | Truncated secreted metalloprotease                                                  | 0.204 |

**Table S5: Culture analysis of murine tissues engorged by infected ticks**

Isolation of viable *B. burgdorferi* by culture analysis of tissues from murine hosts after infestation with control (ds*GFP*) or various knockdown ticks (ds*Dome1*, ds*JAK*, and ds*STAT*), as detailed in the manuscript, is shown. The culture positivity or negativity of each tissue type from each individual animal (four mice per group) is indicated by “+” or “-”, respectively.

|                 | <b>Skin</b> | <b>Heart</b> | <b>Joint</b> |
|-----------------|-------------|--------------|--------------|
| ds <i>GFP</i>   | + + + +     | + - - -      | + + + +      |
| ds <i>Dome1</i> | - - - -     | - - - -      | - - - -      |
| ds <i>JAK</i>   | + - - +     | - - - -      | - - - -      |
| ds <i>STAT</i>  | - - - -     | - - - -      | - - - -      |



**Table S6: Oligonucleotide primers used in the study (FP, forward primer; RP reverse primer)**

| <b>Primer name</b>        | <b>5'-sequence-3'</b>                                            | <b>Purpose</b>                             |
|---------------------------|------------------------------------------------------------------|--------------------------------------------|
| <i>Dome1</i> pcDNA FP     | GACTACAAAGACGATGACGACAAGGCCTGC<br>CGTTCTATCTTCTCTCCCATC          | EC expression (CHO)                        |
| <i>Dome1</i> pcDNA His RP | GACACTATAGAATAGCTAATGATGATGATGA<br>TGATGTGAGATGGCGGGACCAACAGACTC | EC expression (CHO)                        |
| <i>Dome1</i> pGEX1 FP     | GGTGAATTCATGAACAAGACGTCCCTGATG<br>G                              | Truncated EC expression ( <i>E. coli</i> ) |
| <i>Dome1</i> pGEX1 RP     | GGTGGTGC GGCCGCTTGAAACTGGGATC<br>ACACA                           | Truncated EC expression ( <i>E. coli</i> ) |
| <i>Dome1</i> IG FP        | ACATGGATCCGCCTGCCGTTCTATCTTCTCT<br>CCCATC                        | IG domain expression ( <i>E. coli</i> )    |
| <i>Dome1</i> IG RP        | TAGTGTGACTCATCCGACGGTGACTAACG<br>TTGC                            | IG domain expression ( <i>E. coli</i> )    |
| <i>GFP</i> RNAi 1FP       | AATGAGCTCGAGGTGAAGTTCGAGGGCGA                                    | RNA interference (RNAi)                    |
| <i>GFP</i> RNAi 1RP       | AATGGTACCTCCATGCCGAGAGTGATCCC                                    | RNAi                                       |
| <i>Dome1</i> RNAi 1FP     | TAATACGACTCACTATAGGGGTGCCAGATTC<br>GCCACCTA                      | RNAi                                       |
| <i>Dome1</i> RNAi 1RP     | TAATACGACTCACTATAGGGCAGAACACTGT<br>GTAGCCTGG                     | RNAi                                       |
| <i>Dome1</i> RNAi 2FP     | TAATACGACTCACTATAGGGGCATGCTGCC<br>CCGTTTCGTA                     | RNAi                                       |
| <i>Dome1</i> RNAi 2RP     | TAATACGACTCACTATAGGGCCGGTAGACC<br>GAGTTTGTGT                     | RNAi                                       |
| <i>Dome1</i> RNAi 3FP     | TAATACGACTCACTATAGGGCTCATTGGTCA<br>TTGGAGTGG                     | RNAi                                       |
| <i>Dome1</i> RNAi 3RP     | TAATACGACTCACTATAGGGGAGGCTGTCCG<br>TGGCCGTT                      | RNAi                                       |
| <i>Dome1</i> RNAi 4FP     | TAATACGACTCACTATAGGGGTCCTCCCTAC<br>CCACAACAC                     | RNAi                                       |
| <i>Dome1</i> RNAi 4RP     | TAATACGACTCACTATAGGGGACCGACACA<br>CGGAGTACG                      | RNAi                                       |
| <i>Dome1</i> RNAi 5FP     | TAATACGACTCACTATAGGGGAGTCCCACC<br>CTTTTTGGG                      | RNAi                                       |
| <i>Dome1</i> RNAi 5RP     | TAATACGACTCACTATAGGGTAAACAGTCCG<br>CGGGTTCA                      | RNAi                                       |
| <i>Dome1</i> QFP          | TGGACTGAGAGCGTCTTCCT                                             | Quantitative PCR (qPCR)                    |
| <i>Dome1</i> QRP          | CACCTGTCCTCCAGTGGATT                                             | qPCR                                       |
| <i>Dome2</i> Q FP         | CGATGATCTTCGTCAAAGCA                                             | qPCR                                       |
| <i>Dome2</i> Q RP         | TTTCAACAGAGCGGAGGAGT                                             | qPCR                                       |
| <i>Dome3</i> Q FP         | ATGACCGATCAGACTGAGTCTCAAGAC                                      | qPCR                                       |
| <i>Dome3</i> Q RP         | CTCGTACAAGATATCCGGGAACG                                          | qPCR                                       |
| <i>Dome4</i> Q FP         | GCCAACACAGAGTTCGAGGT                                             | qPCR                                       |
| <i>Dome4</i> Q RP         | CCACAGAGTTCTTGCTCGTG                                             | qPCR                                       |
| <i>Dome5</i> Q FP         | ACTCAAGCCCTTTTCGTTCTACG                                          | qPCR                                       |
| <i>Dome5</i> Q RP         | TGTGGTTCGCTCCATTGTAGG                                            | qPCR                                       |
| <i>Dome5</i> RNAi 1FP     | TAATACGACTCACTATAGGGCGTCATCCTGC<br>ACTACATC                      | RNAi                                       |

|                                        |                                                |                                       |
|----------------------------------------|------------------------------------------------|---------------------------------------|
| <i>Dome5</i> RNAi 1RP                  | TAATACGACTCACTATAGGAGGTATTGGGTA<br>AAGGTTTCC   | RNAi                                  |
| <i>Dome5</i> RNAi 2FP                  | TAATACGACTCACTATAGGCTGTACGAGGT<br>GAAGGTGCAG   | RNAi                                  |
| <i>Dome5</i> RNAi 2RP                  | TAATACGACTCACTATAGGAGGCTTGTTCCTC<br>GTTTCAGTTG | RNAi                                  |
| <i>Dome5</i> RNAi 3FP                  | TAATACGACTCACTATAGGGGTGTACCAGTA<br>TCACTACAC   | RNAi                                  |
| <i>Dome5</i> RNAi 3RP                  | TAATACGACTCACTATAGGATCGGTTCTTTG<br>CCTTGTTGC   | RNAi                                  |
| <i>Dome5</i> FP                        | ATTCAGATCTGTTCCCGACCCCCGGGAT<br>CCCCATCGTG     | Protein expression ( <i>E. coli</i> ) |
| <i>Dome5</i> RP                        | ATAGCTCGAGTTACTCTGACACTTACTCTGA<br>AGG         | Protein expression ( <i>E. coli</i> ) |
| <i>B. burgdorferi flaB</i> FP          | TTGCTGATCAAGCTCAATATAACCA                      | qPCR                                  |
| <i>B. burgdorferi flaB</i><br>RP       | TTGAGACCCTGAAAGTGATGC                          | qPCR                                  |
| <i>Staphylococcus</i> 16<br>QFP        | CGGACGAGAAGCTTGCTT                             | qPCR                                  |
| <i>Staphylococcus</i> 16<br>QRP        | GCATCGTTGCCTTGTA                               | qPCR                                  |
| <i>Acinetobacter</i> 16s Q<br>FP       | TAGAGTATGGGAGAGGA                              | qPCR                                  |
| <i>Acinetobacter</i> 16s Q<br>RP       | TTTACGGCATGGACTACC                             | qPCR                                  |
| <i>Pseudomonas</i> 16s Q<br>FP         | TGCTGAGAACTTCCAGAGA                            | qPCR                                  |
| <i>Pseudomonas</i> 16s Q<br>RP         | GCTAAGGGCCATGATGAACTT                          | qPCR                                  |
| <i>Enterococcus</i> 16s Q<br>FP        | CCTGCCCATCAGAAGGG                              | qPCR                                  |
| <i>Enterococcus</i> 16s<br>QRP         | CCTGTCTCAGTCCCAATGTGGCCGATCACC                 | qPCR                                  |
| <i>Rickettsia</i> 16s Q RP             | CTTGCGTTAGCTCACCACCT                           | qPCR                                  |
| <i>Rickettsia</i> 16s Q FP             | CGTGGAGCAAATCCCTAAAA                           | qPCR                                  |
| <i>Lysinibacillus</i> 16s Q<br>FP      | CGCGAGAGGGAGCTAATCCGATAAAG                     | qPCR                                  |
| <i>Lysinibacillus</i> 16s Q<br>RP      | CTATCCCACCTTCGGCGGCTGGCTCCAA                   | qPCR                                  |
| <i>Brevibacterium</i> 16s Q<br>FP      | CGTCTGCTGTGGAAACGCAA                           | qPCR                                  |
| <i>Brevibacterium</i> 16s Q<br>RP      | CCTTGTAAGGTTCTTCG                              | qPCR                                  |
| <i>Protein Kinase C</i> Q<br>FP        | TTCTGCGTCGTCAACCTCAAGG                         | qPCR                                  |
| <i>Protein Kinase C</i> Q<br>RP        | CTCGTAGATCTTCTGGTGCTTGATG                      | qPCR                                  |
| <i>Peroxiredoxin</i> Q FP              | CAAAGGCCAAGTACCACCTCAAG                        | qPCR                                  |
| <i>Peroxiredoxin</i> Q RP              | GCTTGTTCCGGATGGGTTGTGG                         | qPCR                                  |
| <i>Glutathione<br/>peroxidase</i> Q FP | GGAGATTCTGAACGGGATCAAGTACG                     | qPCR                                  |

|                                    |                                               |      |
|------------------------------------|-----------------------------------------------|------|
| <i>Glutathione peroxidase Q</i> RP | GCCTGTCAACCAGAACTTCTCG                        | qPCR |
| <i>Peritrophin-1</i> FP            | ATGCCGAATAAGGTCGACTG                          | qPCR |
| <i>Peritrophin-1</i> RP            | AGTGGAAATCTGGACGGAATG                         | qPCR |
| <i>Peritrophin-2</i> FP            | AGAAGGGATTGGCCTTCAAC                          | qPCR |
| <i>Peritrophin-2</i> RP            | TACAGGCTACGCAACAAACG                          | qPCR |
| <i>Peritrophin-3</i> FP            | TGTGACAAGACGACCTCCAG                          | qPCR |
| <i>Peritrophin-3</i> RP            | CATCGAGTTCTTGGCCTGT                           | qPCR |
| <i>Peritrophin-4</i> FP            | ACCTGTCGACGGATGTGACT                          | qPCR |
| <i>Peritrophin-4</i> RP            | CCTCGCACGTGTAGCTGTAG                          | qPCR |
| <i>Peritrophin-5</i> FP            | ACCTGGGATTCCAGTGTCC                           | qPCR |
| <i>Peritrophin-5</i> RP            | CCAGCCGTGCACGTTGAG                            | qPCR |
| <i>JAK</i> RNAi FP                 | TAATACGACTCACTATAGGGACTCTGGATAG<br>GATTAAGG   | RNAi |
| <i>JAK</i> RNAi RP                 | TAATACGACTCACTATAGGGCAAGTGATGCT<br>CTCTTTG    | RNAi |
| Mouse <i>Actb</i> QFP              | AGAGGGAAATCGTGCGTGAC                          | qPCR |
| Mouse <i>Actb</i> QRP              | CAATAGTGATGACCTGGCCGT                         | qPCR |
| <i>I. scapularis Actb</i> QFP      | GGTATCGTGCTCGACTC                             | qPCR |
| <i>I. scapularis Actb</i> QRP      | ATCAGGTAGTCGGTCAGG                            | qPCR |
| <i>Notch</i> Q FP                  | CGTCACCCTCGACAACTACACG                        | qPCR |
| <i>Notch</i> Q RP                  | CTCGCAGGGCTTTGCCTTGC                          | qPCR |
| <i>Delta</i> Q FP                  | CGCGGACTTTGAATCGGTTG                          | qPCR |
| <i>Delta</i> Q RP                  | TGACGTAGACGACCGAACTG                          | qPCR |
| <i>Hedgehog</i> QFP                | GGAGGTGATCAGCTTCTTGGATCG                      | qPCR |
| <i>Hedgehog</i> QRP                | GGTACTAGTCTGCACCAGAATGTAGC                    | qPCR |
| <i>Hedgehog</i> RNAi FP            | TAATACGACTCACTATAGGGGTTCCACAGAT<br>GGCGCTTCC  | RNAi |
| <i>Hedgehog</i> RNAi RP            | TAATACGACTCACTATAGGGTTCAGTCCAGAA<br>GATACGACT | RNAi |
| <i>EGF</i> Q FP                    | TTCAGAACAAGAGCCTGGACCTGAG                     | qPCR |
| <i>EGF</i> Q RP                    | CAGGTTGTCCATCTTGCTCAGGGTG                     | qPCR |
| <i>Hox1</i> Q FP                   | CAGACAAACGCTGCGGGTGAAC                        | qPCR |
| <i>Hox1</i> Q RP                   | TGCGTCTGCGTGAGACCGAG                          | qPCR |
| <i>Hox2</i> Q FP                   | GATTTTTTGTCCCCTTCCCCTCG                       | qPCR |
| <i>Hox2</i> Q RP                   | AGGGTCTGGAAGTTAGAGTAAGGTTTACG                 | qPCR |
| <i>Hox 3</i> Q FP                  | TCTAGCGACGCTAGCACAAAGAGG                      | qPCR |
| <i>Hox3</i> Q RP                   | TGTCCCACATGGCTTCATTTGTACC                     | qPCR |
| <i>Hox4</i> Q FP                   | CTTCCAAAGCTGGTGCCCTCTGG                       | qPCR |
| <i>Hox4</i> Q RP                   | CAGGTAGTGGTTTCGTGTGGAAGTCC                    | qPCR |
| <i>Hox5</i> Q FP                   | GACATCGATATCGCCATGAGCTCG                      | qPCR |
| <i>Hox5</i> Q RP                   | CAGCCTATCATACGGCGGAAACC                       | qPCR |
| <i>Hox7</i> Q FP                   | GACCCTGGAGTTGGAGAAAGAGTTCC                    | qPCR |
| <i>Hox7</i> Q RP                   | TTGGCCATCTTGTGCTCCTTCTTCC                     | qPCR |
| <i>Hox8</i> Q FP                   | CAGATCCTTGAGCTGGAGAAAGAGTTCC                  | qPCR |
| <i>Hox8</i> Q RP                   | TTGTCCTTCTTCCACTTCATGCGTCG                    | qPCR |
| <i>Hox9</i> Q FP                   | CTGCCGTTTCTACCGATGCTCCTC                      | qPCR |
| <i>Hox9</i> Q RP                   | AAGGCTCCCTGCTCGTCTTG                          | qPCR |

|                          |                                                          |                                                              |
|--------------------------|----------------------------------------------------------|--------------------------------------------------------------|
| Uni <i>Dome1</i> QFP     | CCAGCACTTCCCTACTCCCAGC                                   | qPCR ( <i>Dermacentor variabilis</i> )                       |
| Uni <i>Dome1</i> QRP     | GCTGGGTCTTCATGGCTTGC                                     | qPCR ( <i>D. variabilis</i> )                                |
| Uni <i>Dome1</i> RNAi FP | TAA TAC GAC TCA CTA TAG GGC GGG CAA<br>CTA CAA CTG CAA C | RNAi ( <i>D. variabilis</i> )                                |
| Uni <i>Dome1</i> RNAi RP | TAA TAC GAC TCA CTA TAG GTG CGA CGT<br>CTT GTT GAA CAC C | RNAi ( <i>D. variabilis</i> )                                |
| <i>Dome1</i> Uni 1 FP    | ATT CGG ACA CGG GCA ACT ACA ACT GCA<br>AC                | Cloning of <i>Dome1</i> ortholog<br>( <i>D. variabilis</i> ) |
| <i>Dome1</i> Uni 1 RP    | TCT GAT AAT TCT GCA CCT TGA AGC C                        | Cloning of <i>Dome1</i> ortholog<br>( <i>D. variabilis</i> ) |
| <i>Dome1</i> Uni 2 FP    | GTG AGC TAC ACG GTG TTC TGG TG                           | Cloning of <i>Dome1</i> ortholog<br>( <i>D. variabilis</i> ) |
| <i>Dome1</i> Uni 2 RP    | GTC AGC GGC AGA AAA GCA GCC CAT C                        | Cloning of <i>Dome1</i> ortholog<br>( <i>D. variabilis</i> ) |
| <i>Dome1</i> Full FP     | ATG GAC GGG AGG CAA TGG CGG CAC C                        | Cloning of <i>Dome1</i> ortholog<br>( <i>D. variabilis</i> ) |
| <i>Dome</i> Full RP      | TCA CAC CGA GCA GTC CAC                                  | Cloning of <i>Dome1</i> ortholog<br>( <i>D. variabilis</i> ) |
| DvAct1424F QFP           | CTTTGTTTTCCCGAGCAGAG                                     | qPCR of <i>D. variabilis</i>                                 |
| DvAct1424F QRP           | CCAGGGCAGTAGAAGACGAG                                     | qPCR of <i>D. variabilis</i>                                 |
| <i>Aa Actb</i> Q FP      | TCCTATCCTCACCCCTGAAGTA                                   | qPCR of <i>Amblyomma americanum</i>                          |
| <i>Aa Actb</i> Q RP      | ACGCAGCTCGTTGTACAAG                                      | qPCR of <i>A. americanum</i>                                 |

**Table S7: Details of antibodies used in the study**

| <b>Antibodies</b>                                                         | <b>Reference number, Source</b>          | <b>Clone number</b> | <b>Dilution</b>                  |
|---------------------------------------------------------------------------|------------------------------------------|---------------------|----------------------------------|
| Anti-Dome 1 (Truncated EC) antibody                                       | Current study                            |                     | IF- 1:100                        |
| Anti-Dome 1 (IG domain) antibody                                          | Current study                            |                     | WB- 1:3000                       |
| Anti-Dome 5 antibody                                                      | Current study                            |                     | WB- 1:2000                       |
| Phospho-Histone H3(Ser10) antibody                                        | 9701S, Cell Signaling Technology Inc.    |                     | IF- 1:100                        |
| IFN gamma monoclonal antibody<br>Host: Rat, species reactivity :<br>Mouse | 14-7312-85, Thermo Fisher Scientific     | R4-6A2              | IF- 1:150<br>ELISA-<br>1:1000    |
| Anti-chicken IFN gamma Polyclonal Antibody, Host: Rabbit                  | PB0442C-100 Kingfisher Biotech Inc.      |                     | ELISA- 1:1000                    |
| Purified anti-human IFN- $\gamma$ Antibody, Host: Mouse                   | 502501, BioLegend Inc.                   | 4S.B3               | ELISA- 1:1000                    |
| Alexa Fluor 488 goat anti-rabbit                                          | A-11008 Thermo Fisher Scientific         |                     | IF- 1:150                        |
| Alexa Fluor 568 goat anti-rat                                             | A-11077, Thermo Fisher Scientific        |                     | IF- 1:150                        |
| Phospho-STAT5 alpha (Tyr694) Polyclonal antibody<br>Host: Rabbit          | 71-6900, Thermo Fisher Scientific        |                     | WB- 1:1000                       |
| FITC conjugated goat anti <i>Borrelia</i> Antibody<br>Host: Rabbit        | 95058-200, VWR International LLC.        |                     | IF- 1:200                        |
| Goat Anti Mouse HRP conjugate antibody                                    | 5220-0341, Sera Care                     |                     | WB- 1:10000<br>ELISA- 1:1000     |
| Goat Anti-Rabbit IgG-HRP antibody                                         | 4030-05 SouthernBiotech                  |                     | WB- 1:4000<br>ELISA- 1:1000      |
| Goat Anti-Rat IgG-HRP antibody                                            | 14-16-12 Kirkegaard & Perry Laboratories |                     | WB- 1:10000<br>ELISA- 1:<br>1000 |
| Anti-DDDDK tag antibody<br>Host: Rabbit                                   | ab 1162, Abcam                           |                     | WB- 1: 3000                      |

**WB-** Western blotting, **IF-** Immunofluorescence assay, **ELISA-** Enzyme-linked immunosorbent assay

**Table S8: Protein accession numbers used for the construction of phylogenetic trees**

| Figure number(s) | Accession numbers                                                                                                                                                                                                                                                                                                                                                                                                                                                                                                                                                                                                                                                                                                                                                                                                                                                                                                                                                                                                                                                                                                                                                                                                                                              |
|------------------|----------------------------------------------------------------------------------------------------------------------------------------------------------------------------------------------------------------------------------------------------------------------------------------------------------------------------------------------------------------------------------------------------------------------------------------------------------------------------------------------------------------------------------------------------------------------------------------------------------------------------------------------------------------------------------------------------------------------------------------------------------------------------------------------------------------------------------------------------------------------------------------------------------------------------------------------------------------------------------------------------------------------------------------------------------------------------------------------------------------------------------------------------------------------------------------------------------------------------------------------------------------|
| 1C               | <p>Dome1 (<i>Ixodes scapularis</i>, XP_029844458.1)<br/>           IFNGR (<i>Mus musculus</i>, NP_034641.1)<br/>           IFNGR 1 (<i>Homo sapiens</i>, NP_000407.1)<br/>           IFNGR 2 (<i>Homo sapiens</i>, NP_001316057.1)</p>                                                                                                                                                                                                                                                                                                                                                                                                                                                                                                                                                                                                                                                                                                                                                                                                                                                                                                                                                                                                                         |
| 1B and 1D        | <p>IFNGR1 (<i>Rattus rattus</i>, XP_032750830.1)<br/>           IFNGR1 (<i>Homo sapiens</i>, NP_000407.1)<br/>           IFNGR1 (<i>Mus musculus</i>, NP_034641.1)<br/>           Cnfr (<i>Homo sapiens</i>, NP_001833.1)<br/>           Cnfr (<i>Mus musculus</i>, AAH50928.1)<br/>           IL6 (<i>Rattus norvegicus</i>, NP_058716.2)<br/>           IL6 (<i>Homo sapiens</i>, NP_00556.1)</p> <p>Arthropod Dome ectodomain orthologs:<br/> <i>Bombyx mori</i>, XP_012546276.2; <i>Drosophila melanogaster</i>, NP_523412.1; <i>Musca domestica</i>, XP_005192086.1; <i>Cimex lectularius</i>, CLEC012032; <i>Aedes aegypti</i>, XP_001662596.2; <i>Melipona quadrifasciata</i>, KOX70826.1; <i>Cherax quadricarinatus</i>, QKU38106.1; <i>Eriocheir sinensis</i>, QBA18592.1; <i>Penaeus vannamei</i>, AGY46351.1; <i>Strigamia maritima</i>, SMAR011060-RA, SMAR011063-RA; <i>Ixodes scapularis</i>, XP_029844458.1; <i>Dermacentor silvarum</i>, XP_037556658.1; <i>Rhipicephalus microplus</i>, XP_037287858.1; <i>Galendromus occidentalis</i>, XP_003744080.1; <i>Sarcoptes scabiei</i>, KAF7491423.1; <i>Parasteatoda tepidariorum</i>, XP_015924832.1; <i>Dinotrombium tinctorium</i>, RWS16955.1; <i>Tetranychus urticae</i>, XP_025016179.1</p> |
| S3               | <p>Interfer-bind motif:<br/>           Uncharacterized protein (<i>Nocardioides albidus</i>, A0A5C4VQX2/73-161)<br/>           FNIII (<i>Roseburia sp.</i>, R5UNT6/34-137)<br/>           Uncharacterized protein (<i>Winogradskyella epiphytica</i>, A0A0A1DVD9/41-134)<br/>           FNIII protein (<i>Anaerostipes sp.</i>, R6QE57/57-116 protein)<br/>           Dome1 (<i>Ixodes scapularis</i>, XP_029844458.1/255-321)<br/>           Secreted protein (<i>Arthrobacter simplex</i>, A0A2V4XIC5/317-366)<br/>           Endonuclease I (<i>Xanthomarina gelatinilytica</i>, M7MET9/309-367)<br/>           Cytokine Receptor family (<i>Danio rerio</i>, A0FJH7_DANRE/115-217)<br/>           IFN bind domain containing protein (<i>Tetraodon nigroviridis</i>, H3C2Q6_TETNG/53-151)<br/>           IFNgR 2 (<i>Bos taurus</i>, INAR2_BOVIN/132-234)</p>                                                                                                                                                                                                                                                                                                                                                                                              |

|     |                                                                                                                                                                                                                                                                                                                                                                                                                                                                                                                                                                                                                                                                                                                                                                                                                                                                                                                                                                                                                                                                                                                                                                                                                                                                                                                                                                                                                                                                                                                                                                                                                                                                                                                                                                                                                                                                                               |
|-----|-----------------------------------------------------------------------------------------------------------------------------------------------------------------------------------------------------------------------------------------------------------------------------------------------------------------------------------------------------------------------------------------------------------------------------------------------------------------------------------------------------------------------------------------------------------------------------------------------------------------------------------------------------------------------------------------------------------------------------------------------------------------------------------------------------------------------------------------------------------------------------------------------------------------------------------------------------------------------------------------------------------------------------------------------------------------------------------------------------------------------------------------------------------------------------------------------------------------------------------------------------------------------------------------------------------------------------------------------------------------------------------------------------------------------------------------------------------------------------------------------------------------------------------------------------------------------------------------------------------------------------------------------------------------------------------------------------------------------------------------------------------------------------------------------------------------------------------------------------------------------------------------------|
|     | <p>FNIII (<i>Amycolatopsis sulphurea</i>, A0A2A9FF12/102-196)<br/> IFNgR 2 (<i>Homo sapiens</i>, NP001316057.1)<br/> IFNAR1 (<i>Gallus gallus</i>, A0A1D5PRB3_CHICK/133-231)<br/> IFNAR1 (<i>Sus scrofa</i>, INAR1_PIG/125-224)<br/> IFNgR (<i>Mus musculus</i>, NP_034641.1/132-244)<br/> IFNgR 1 (<i>Homo sapiens</i>, NP_000407.1/126-237)<br/> Tissue Factor (<i>Sumatran orangutan</i>, Q5R8A6_PONAB/138-245)<br/> Lacl (<i>Rattus norvegicus</i>, Q66HI4_RAT/139-246)<br/> Tissue Factor (<i>Oryctolagus cuniculus</i>, TF_RABIT/136-243)<br/> Interferon alpha/beta receptor 1 (<i>Bos taurus</i>, INAR1_BOVIN/330-431)</p> <p>Dome1/Cytokine Receptor:<br/> IFNGR2 (<i>Pantherophis guttatus</i>, XP_034291103.1)<br/> IFNGR2 (<i>Ophiophagus hannah</i>, ETE58933.1)<br/> IFNGR2 (<i>Thamnophis elegans</i>, XP_032075387.1)<br/> IFNGR2 (<i>Lacerta agilis</i>, XP_033002843.1)<br/> IFNGR2 (<i>Anolis carolinensis</i>, AGL76447.1)<br/> IFNGR2 (<i>Sceloporus undulatus</i>, XP_042315051.1)<br/> IFNGR2 (<i>Aquila chrysaetos</i>, XP_029876211.1)<br/> IFNGR2 precursor (<i>Gallus gallus</i>, NP_001008676.2)<br/> CIB84_003046 (<i>Bambusicola thoracicus</i>, POI33204.1)<br/> IFNGR2 (<i>Lagopus leucura</i>, XP_042722314.1)<br/> IFNGR2 precursor (<i>Mus musculus</i>, NP_032364.1)<br/> LIFR (<i>Homo sapiens</i>, NP_002301.1)<br/> Cytokine receptor (<i>Musca domestica</i>, XP_005192086.1)<br/> Cytokine receptor NR10 (<i>Mus musculus</i>, BAB88745.1)<br/> Dome1 (<i>Ixodes scapularis</i>, XP_029844458.1)<br/> Ortholog Dome (<i>Dermacentor silvarum</i>, XP_037556658.1)<br/> Ortholog (<i>Rhipicephalus microplus</i>, XP_037287858.1)<br/> Cytokine receptor (<i>Homo sapiens</i>, AAA93193.1)<br/> Cntfr protein (<i>Mus musculus</i>, AAH50928.1)<br/> CNFTR (<i>Homo sapiens</i>, NP_001833.1)<br/> CNFTR X1 (<i>Homo sapiens</i>, XP_016869749.1)</p> |
| S18 | <p>Dome orthologs<br/> <i>Hyalomma asiaticum</i>, DKAH6941609.1; <i>Rhipicephalus microplus</i>, XP_037287858.1; <i>Rhipicephalus sanguineus</i>, XP_037527344.1; <i>Haemaphysalis longicornis</i>, KAH9366377.1; <i>Dermacentor silvarum</i>, XP_037556658.1; <i>Dermacentor variabilis</i>, OP503541; <i>Ixodes scapularis</i>, XP_029844458.1</p>                                                                                                                                                                                                                                                                                                                                                                                                                                                                                                                                                                                                                                                                                                                                                                                                                                                                                                                                                                                                                                                                                                                                                                                                                                                                                                                                                                                                                                                                                                                                          |
